# Supplementary material for: Synthesis of benzylidene amino arylpyridinones and their AIE studies: dual metal sensing of Fe3+ and Hg2+
Source: Royal Society of Chemistry journal article supplement (doi:10.1039/d4nj03858d), 2024-10-23
Supplement: d4nj03858d1.pdf [file d4nj03858d1.pdf]

## “Synthesis of benzylidene amino arylpyridinones and their AIE Studies: Dual metal sensing of Fe<sup>3+</sup> and Hg<sup>2+</sup>”

Murugesan Preethi<sup>a</sup>, Rameshbabu Ajaydev<sup>a</sup>, Shanmugam Sivakumar<sup>a\*</sup>

<sup>a</sup>Department of Organic Chemistry, School of Chemistry, Madurai Kamaraj University, Madurai-625021, India.

\*Corresponding author: Email: [sivakumar.chemistry@mkuniversity.ac.in](mailto:sivakumar.chemistry@mkuniversity.ac.in)

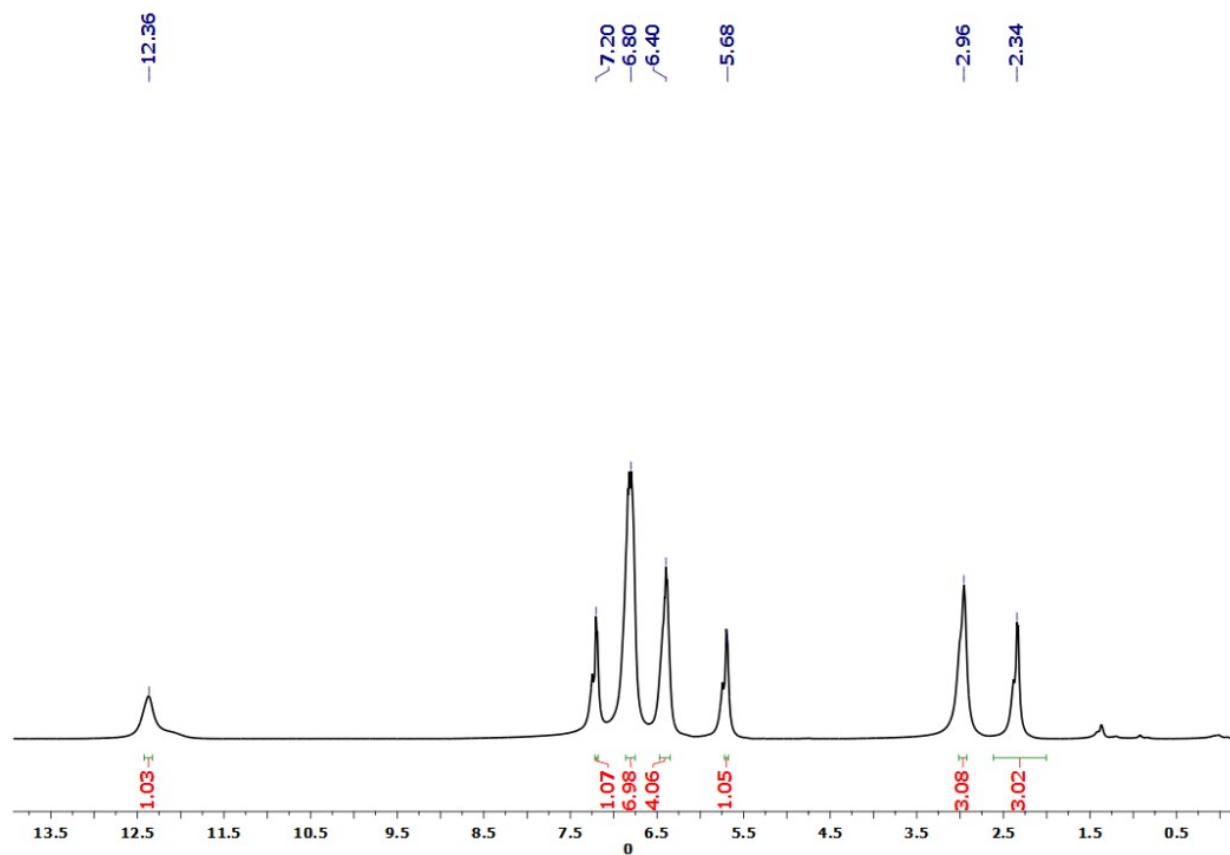

Figure S.1: <sup>1</sup>H NMR Spectrum of 4a

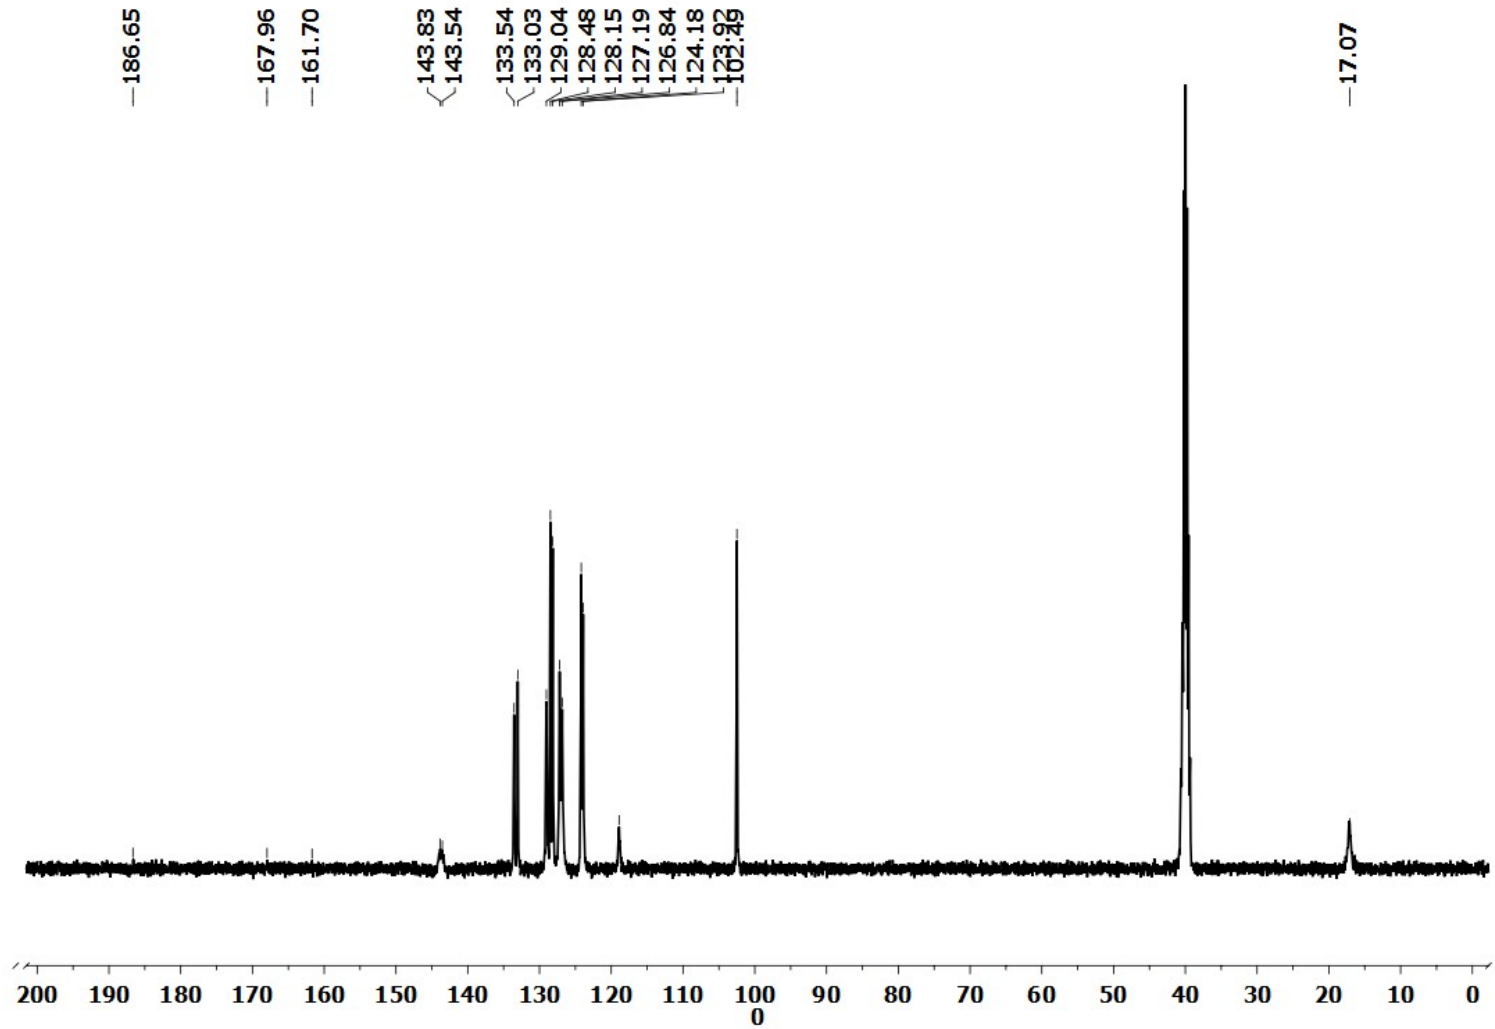

Figure S.2:  $^{13}\text{C}$  NMR Spectrum of 4a

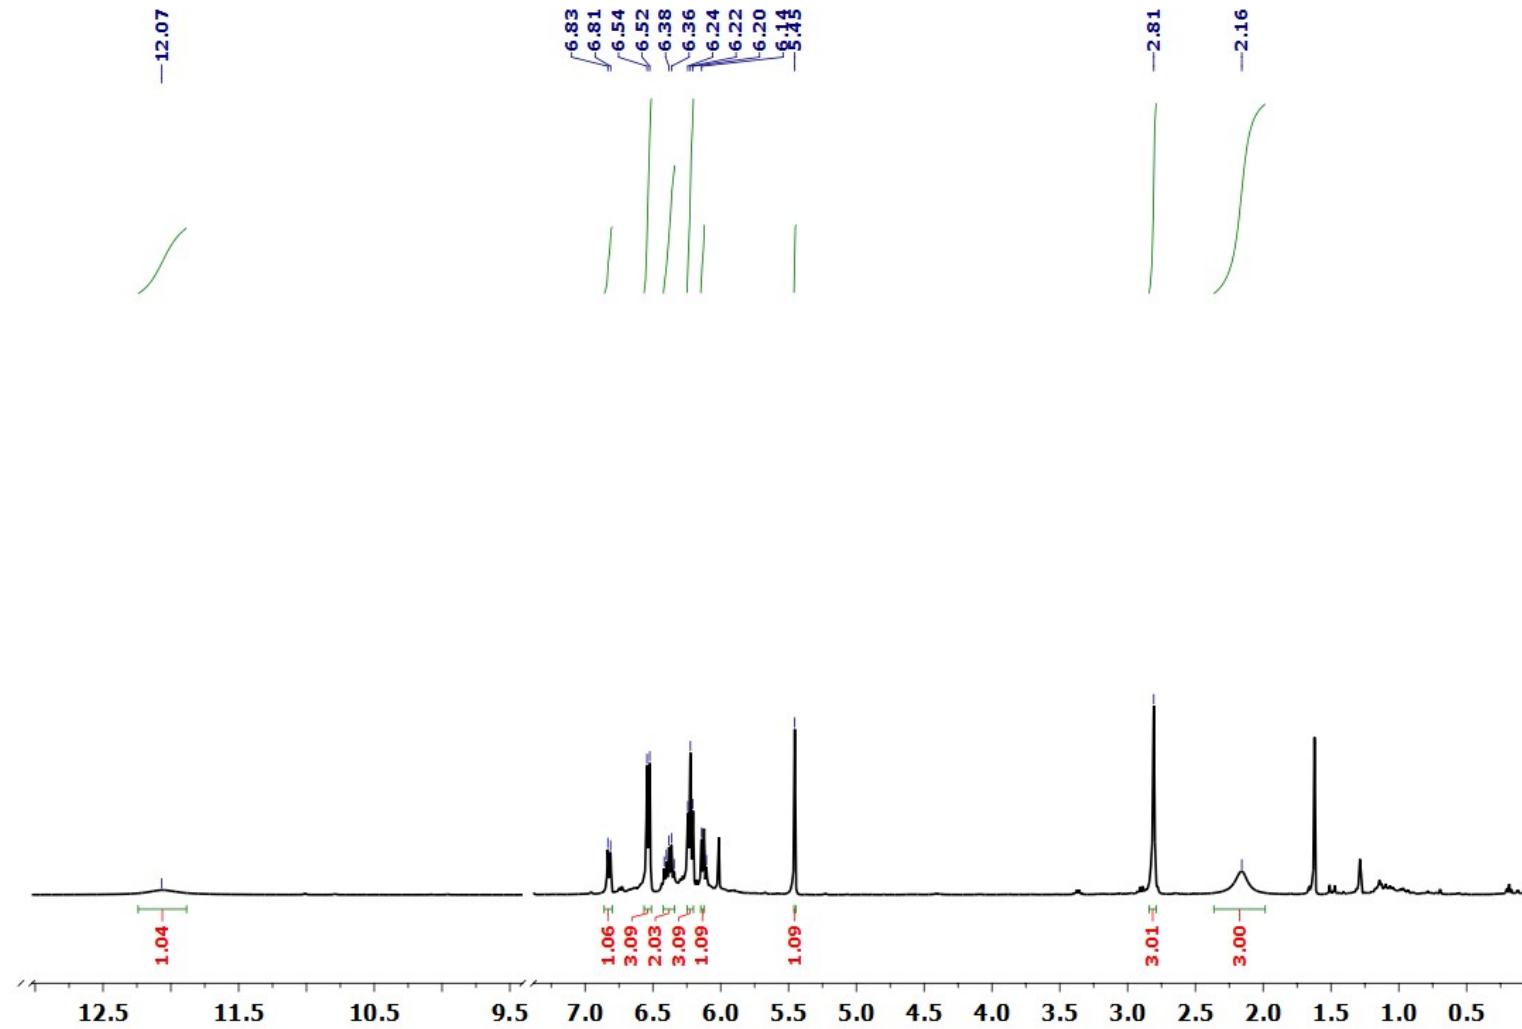

Figure S.3: <sup>1</sup>H NMR Spectrum of 4b

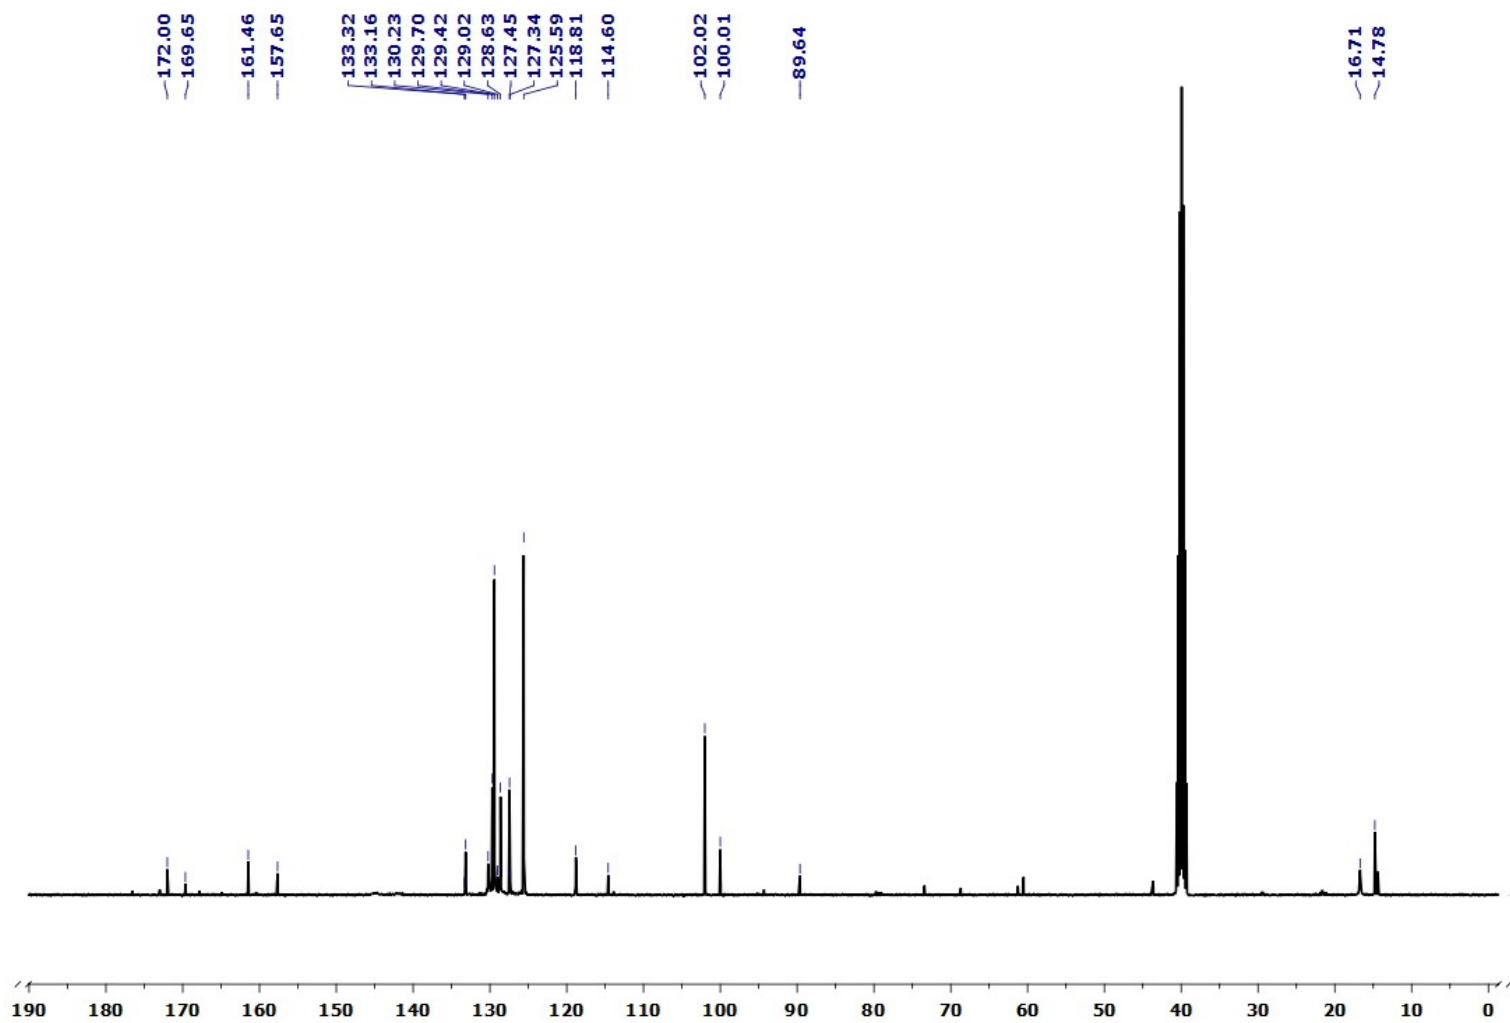

Figure S.4:  $^{13}\text{C}$  NMR Spectrum of 4b

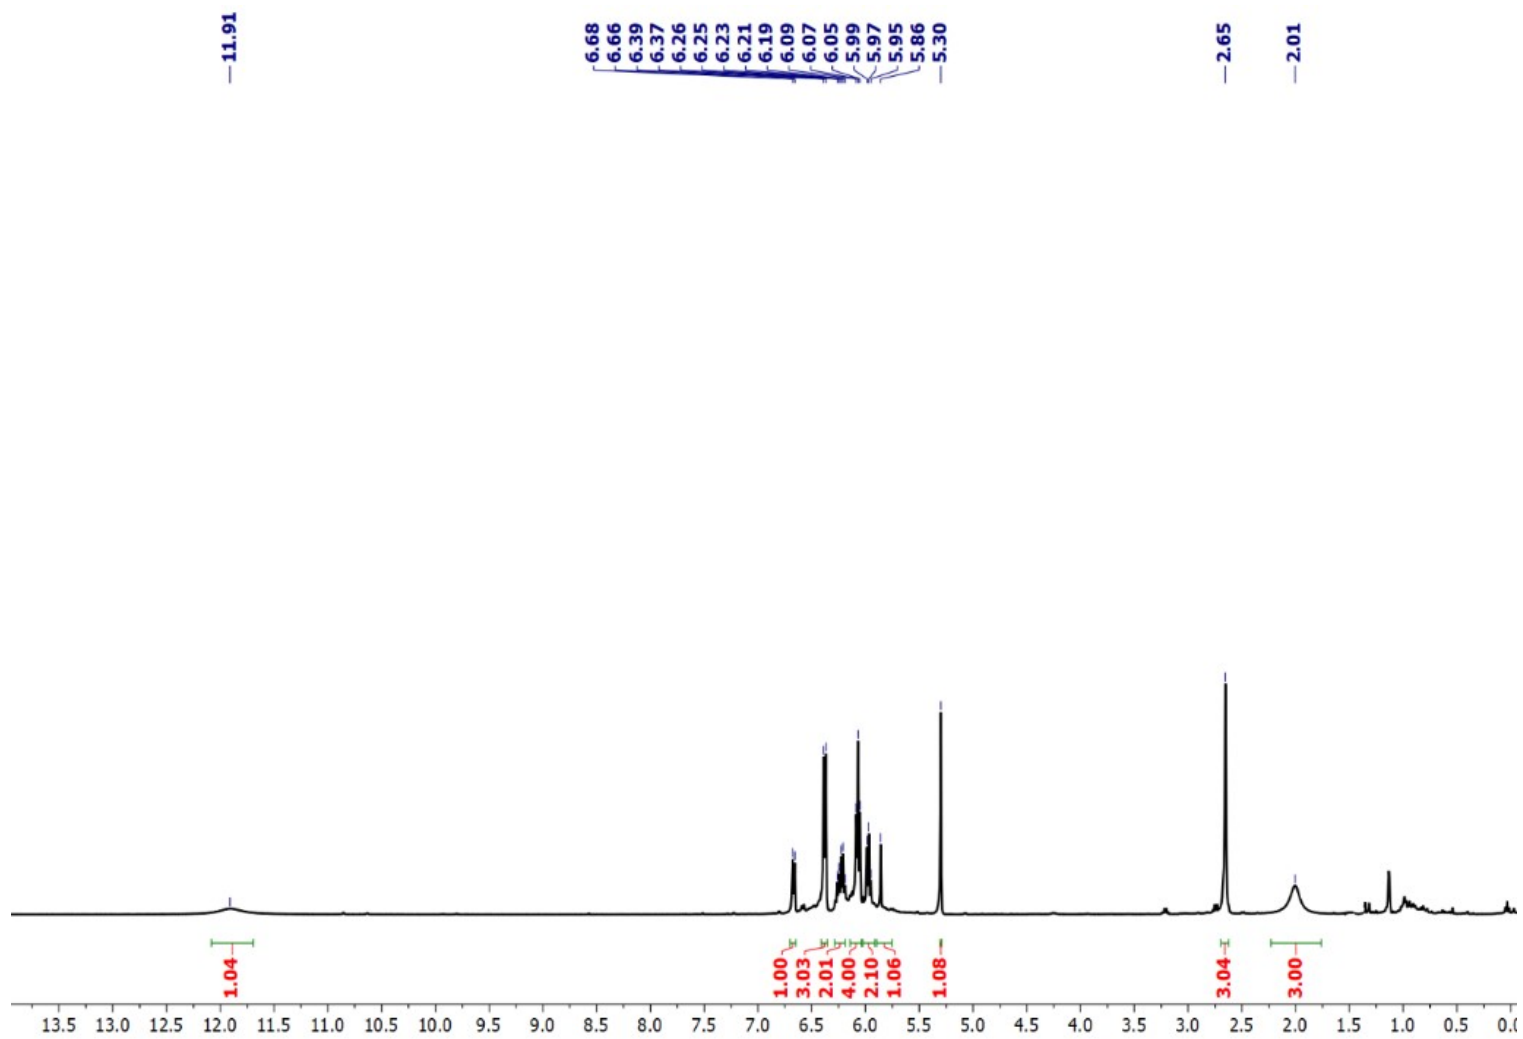

Figure S.5: <sup>1</sup>H NMR Spectrum of 4c

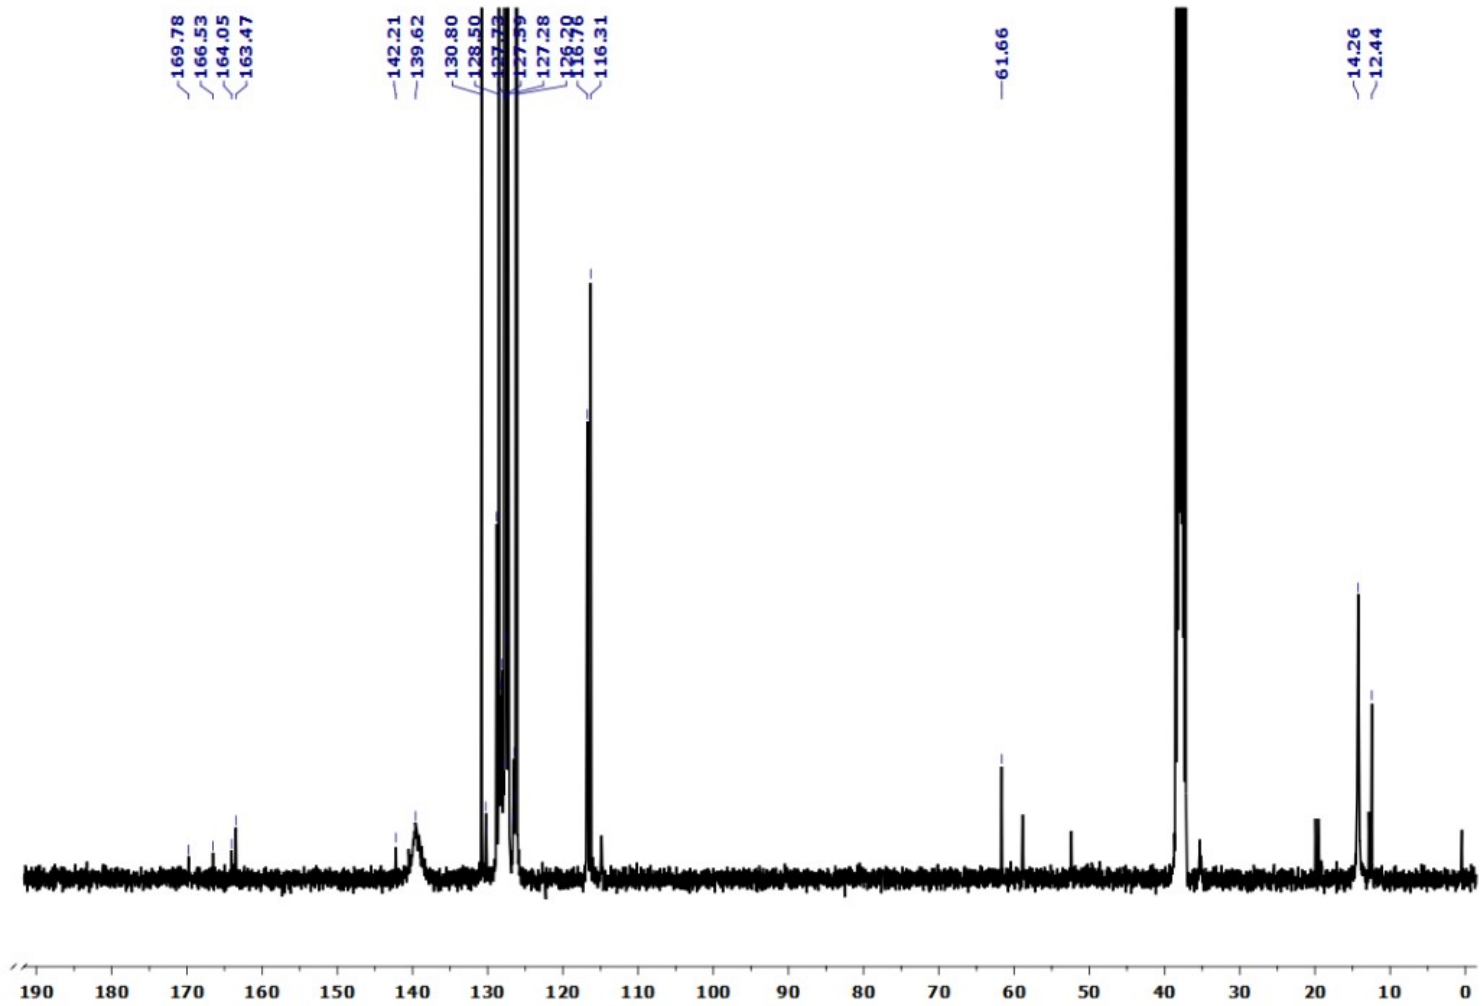

Figure S.6:  $^{13}\text{C}$  NMR Spectrum of 4c

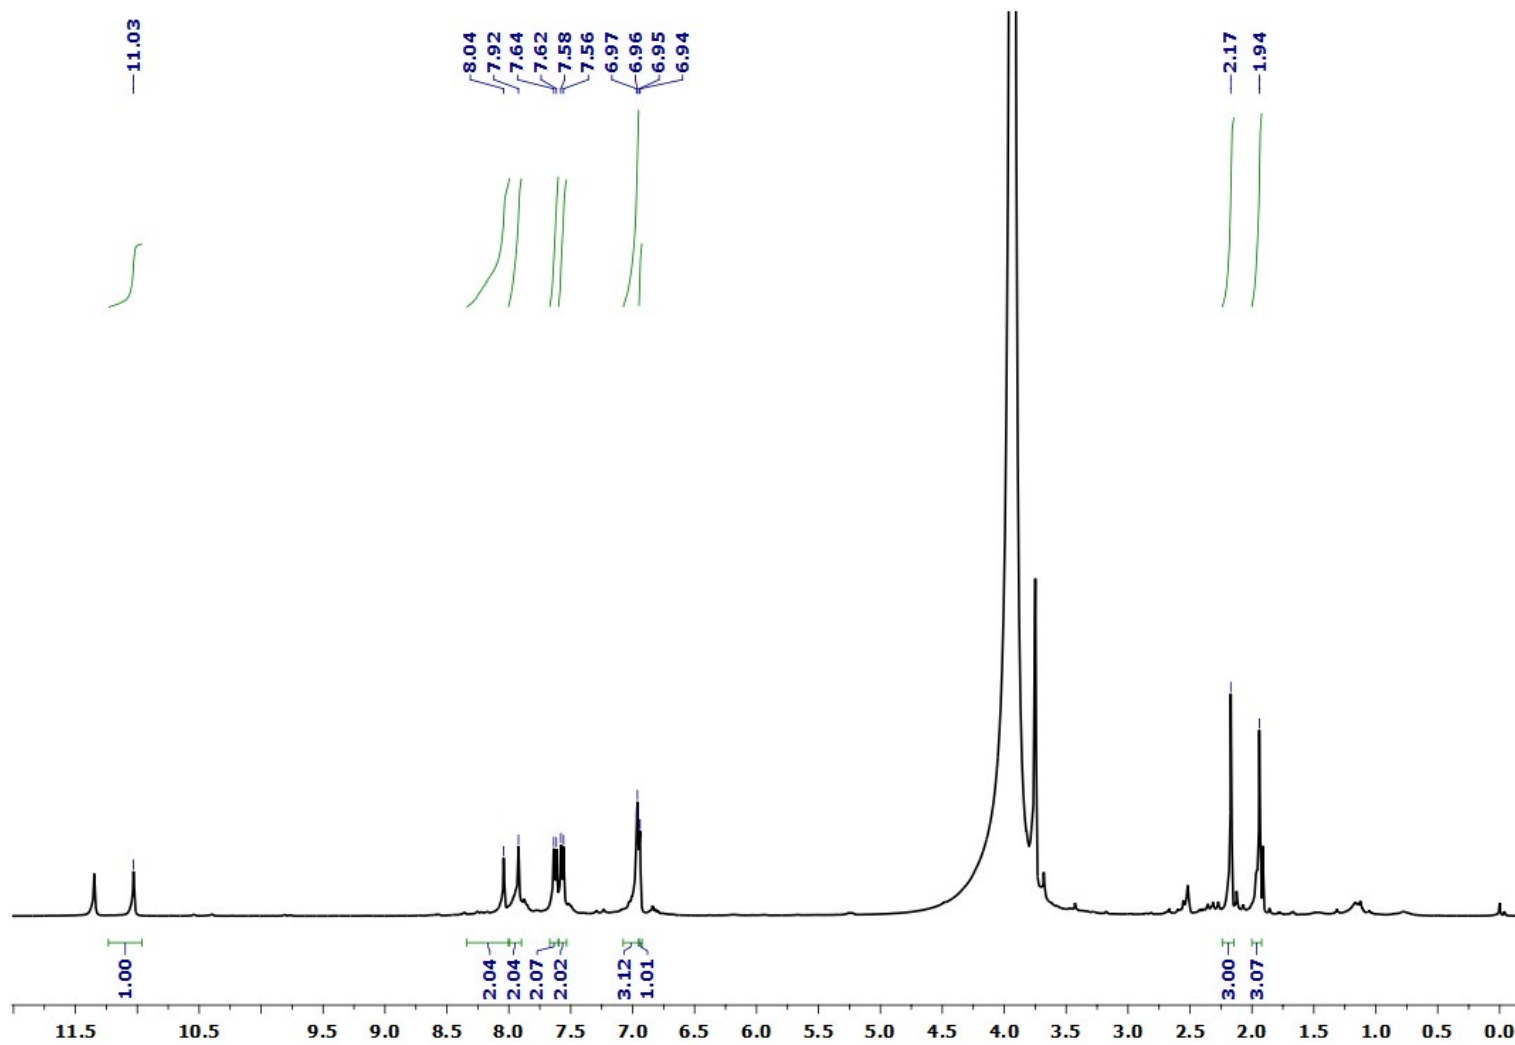

Figure S.7:  $^1\text{H}$  NMR Spectrum of 4d

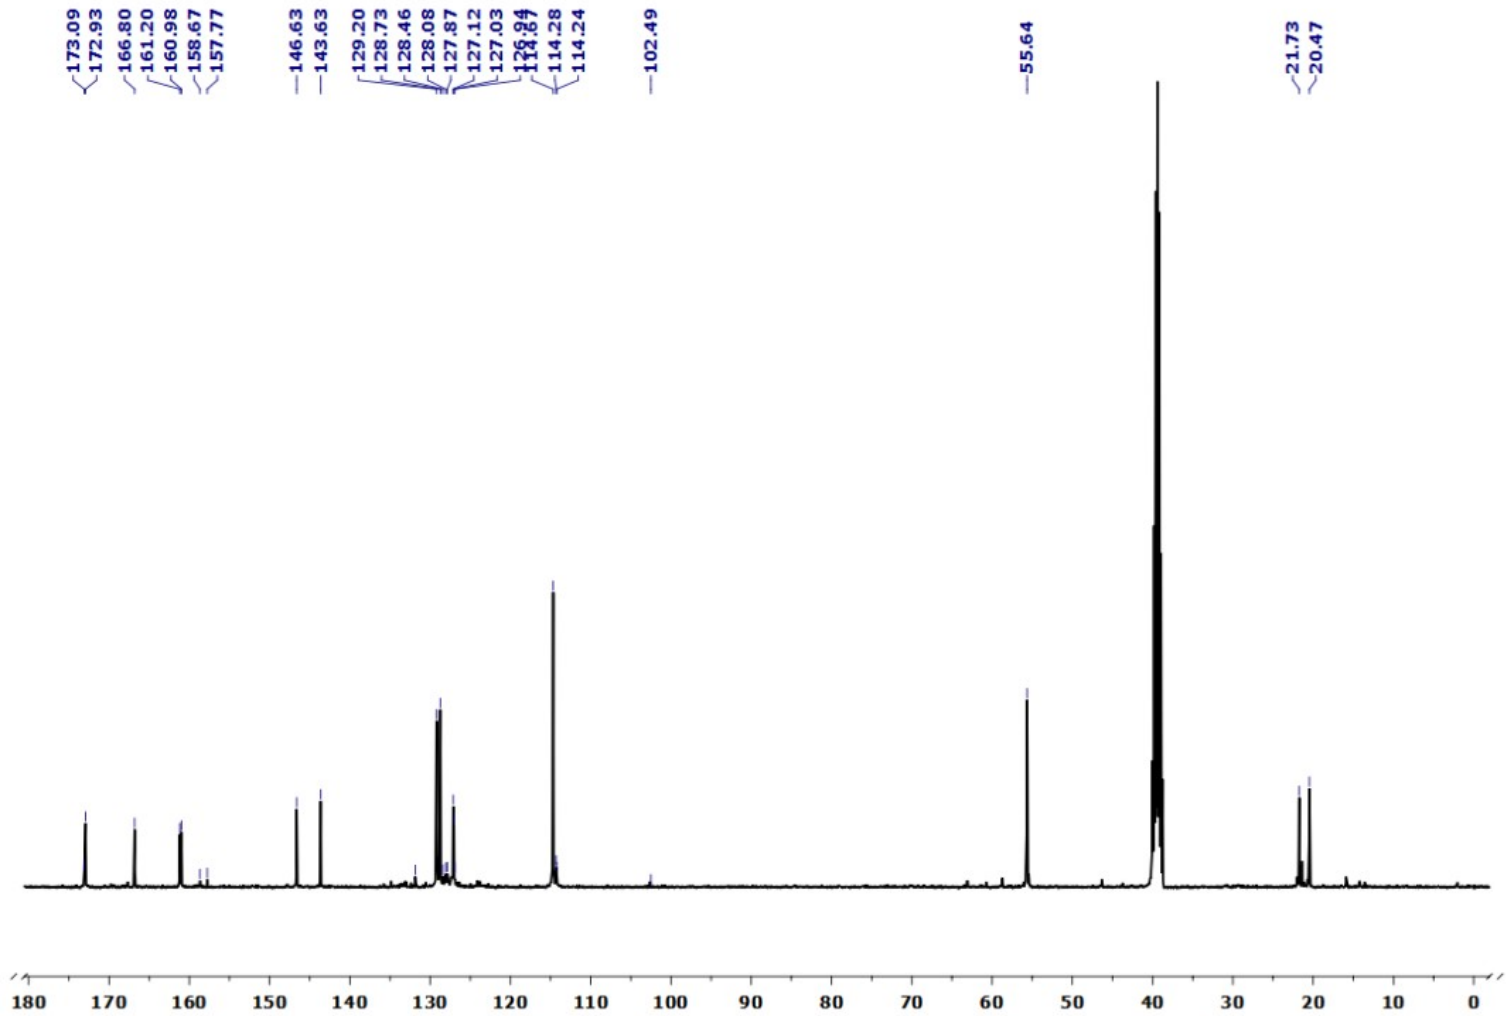

Figure S.8:  $^{13}\text{C}$  NMR Spectrum of 4d



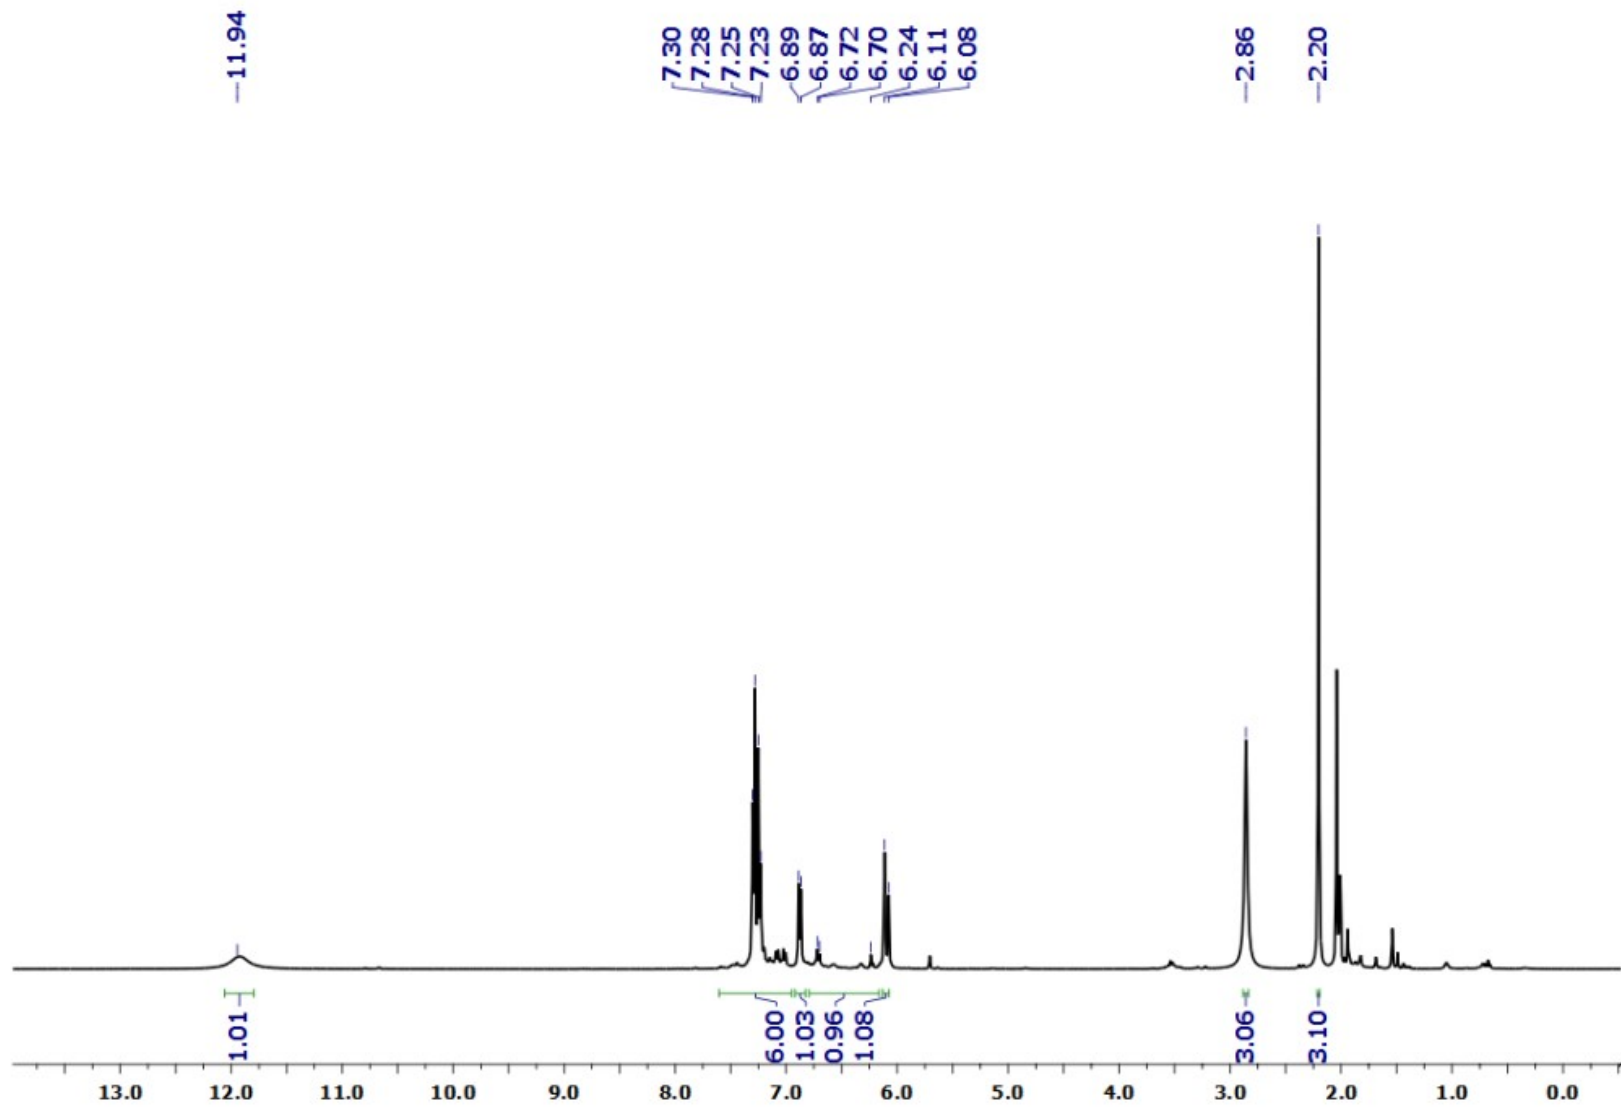

Figure S.9:  $^1\text{H}$  NMR Spectrum of **4e**

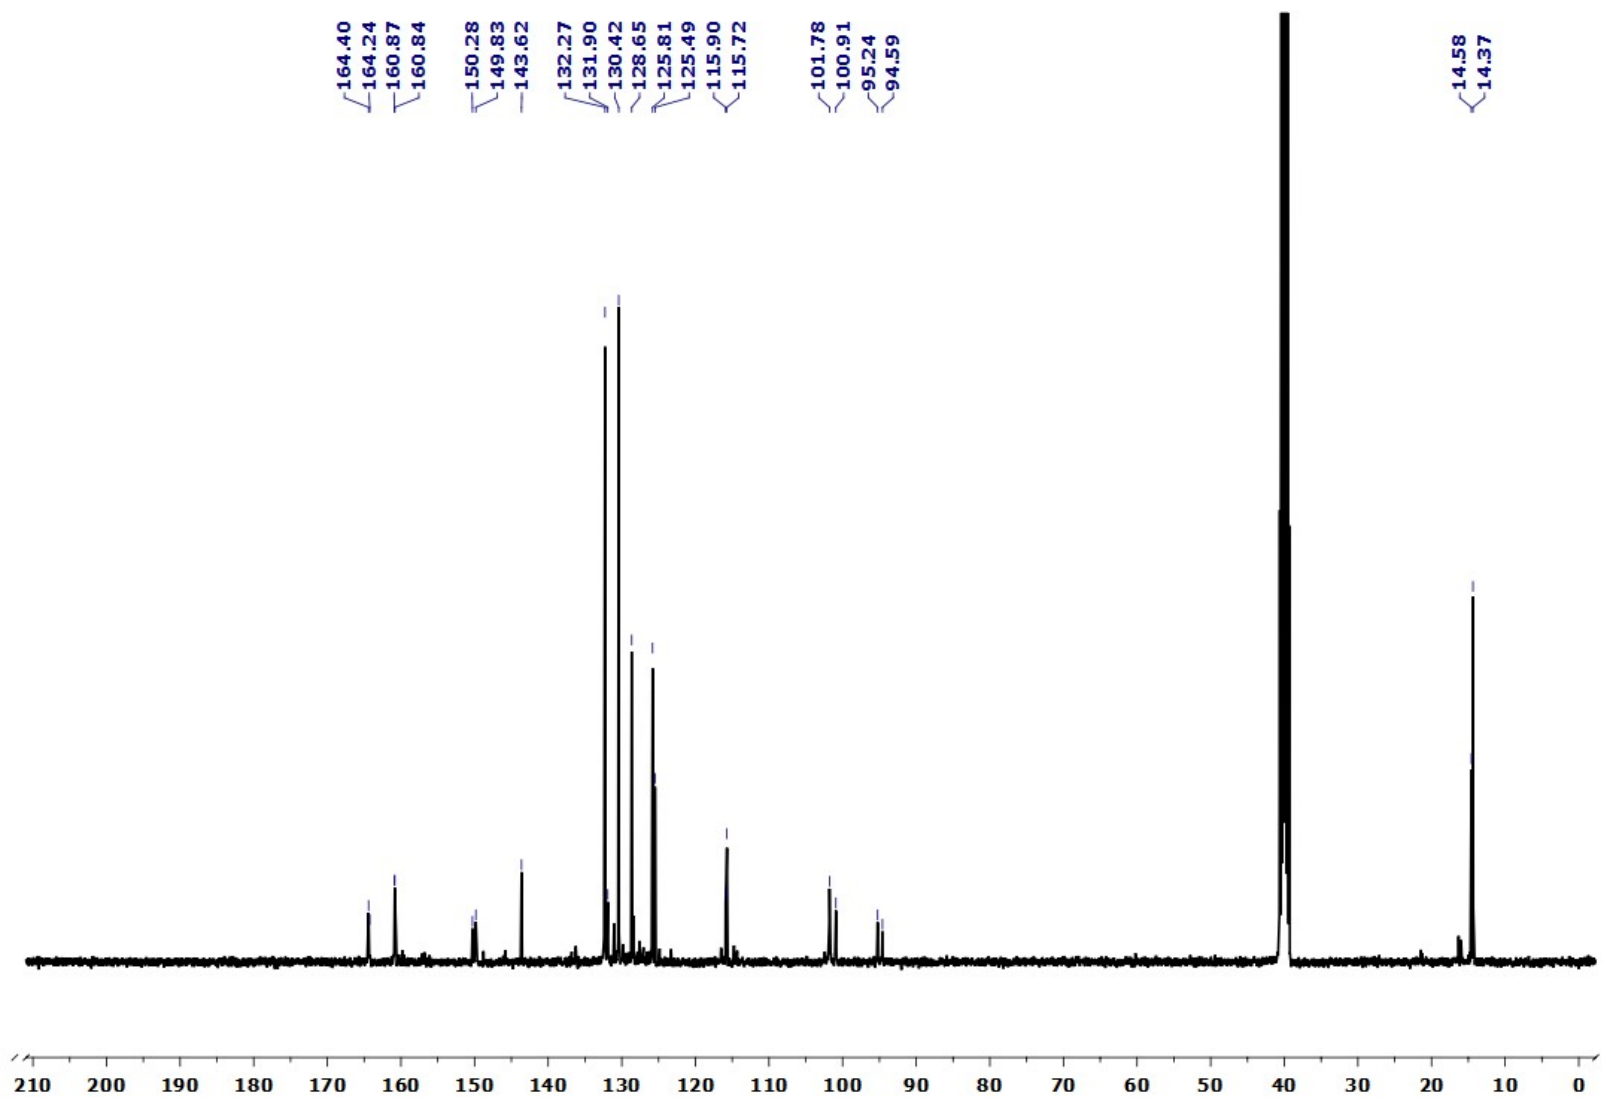

Figure S.10:  $^{13}\text{C}$  NMR Spectrum of 4e

TB

IISER BERHAMPUR  
CAIF HRMS FACILITY  
XEVO-G2XSQTOF#YFA1829

23-Aug-2024 16:50:49

TB-SM-GP-03 New 16 (0.310) AM2 (Ar,22000.0,556.28,0.00,LS 10)

1: TOF MS ES+  
3.64e6

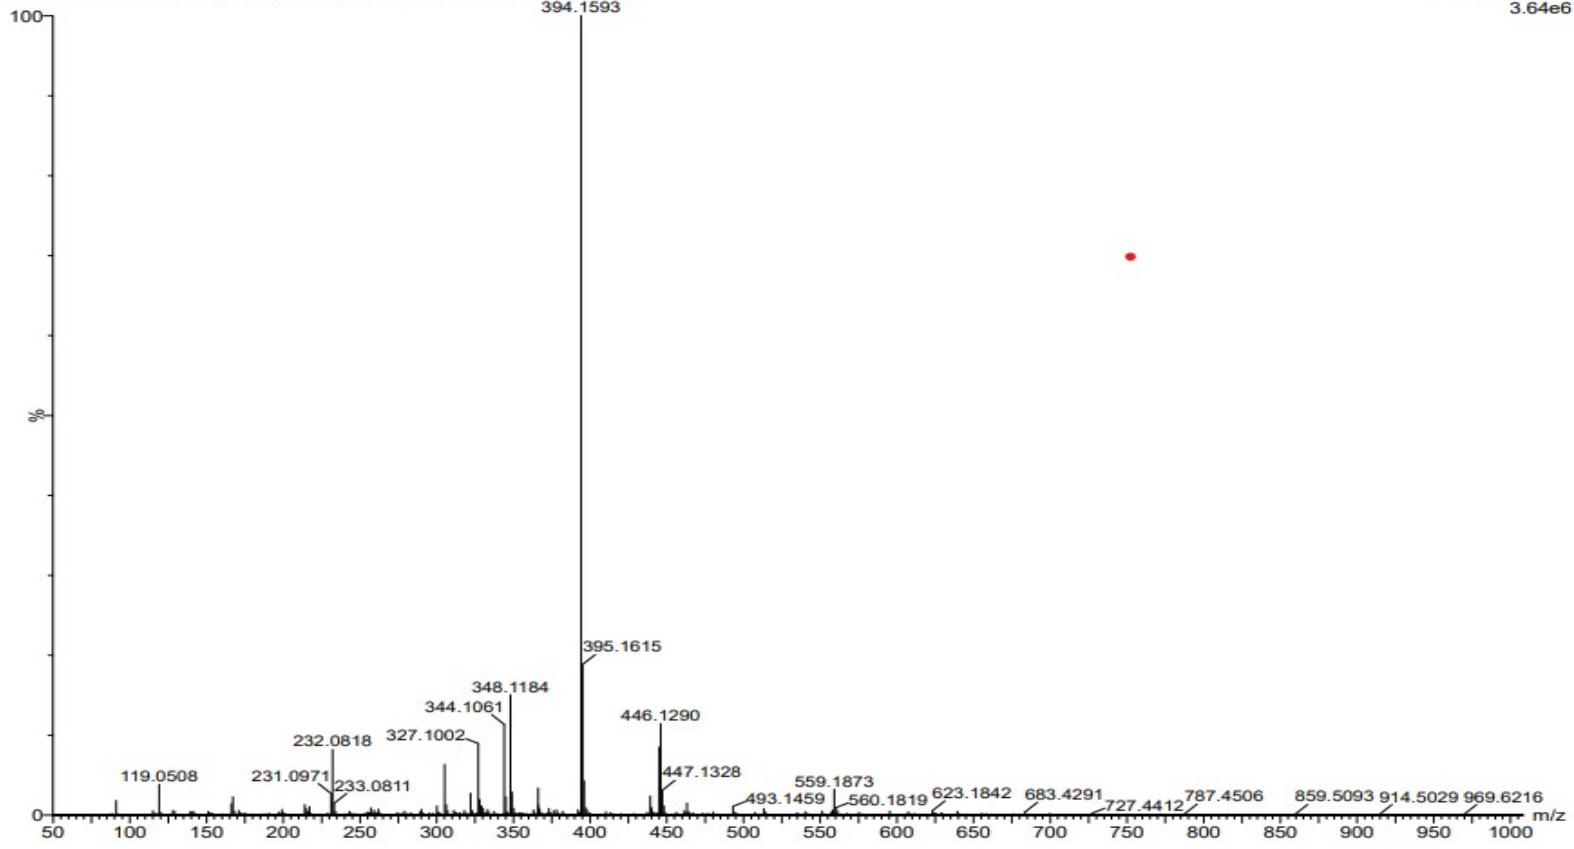

Figure S.11: HRMS-Spectrum of 4a

BBC-46  
23022023\_31 56 (0.537) AM2 (Ar,22000.0,556.28,0.00,LS 10); Cm (56-408:420)

IISc Organic Chemistry

23-Feb-2023  
1: TOF MS ES+  
2.24e4

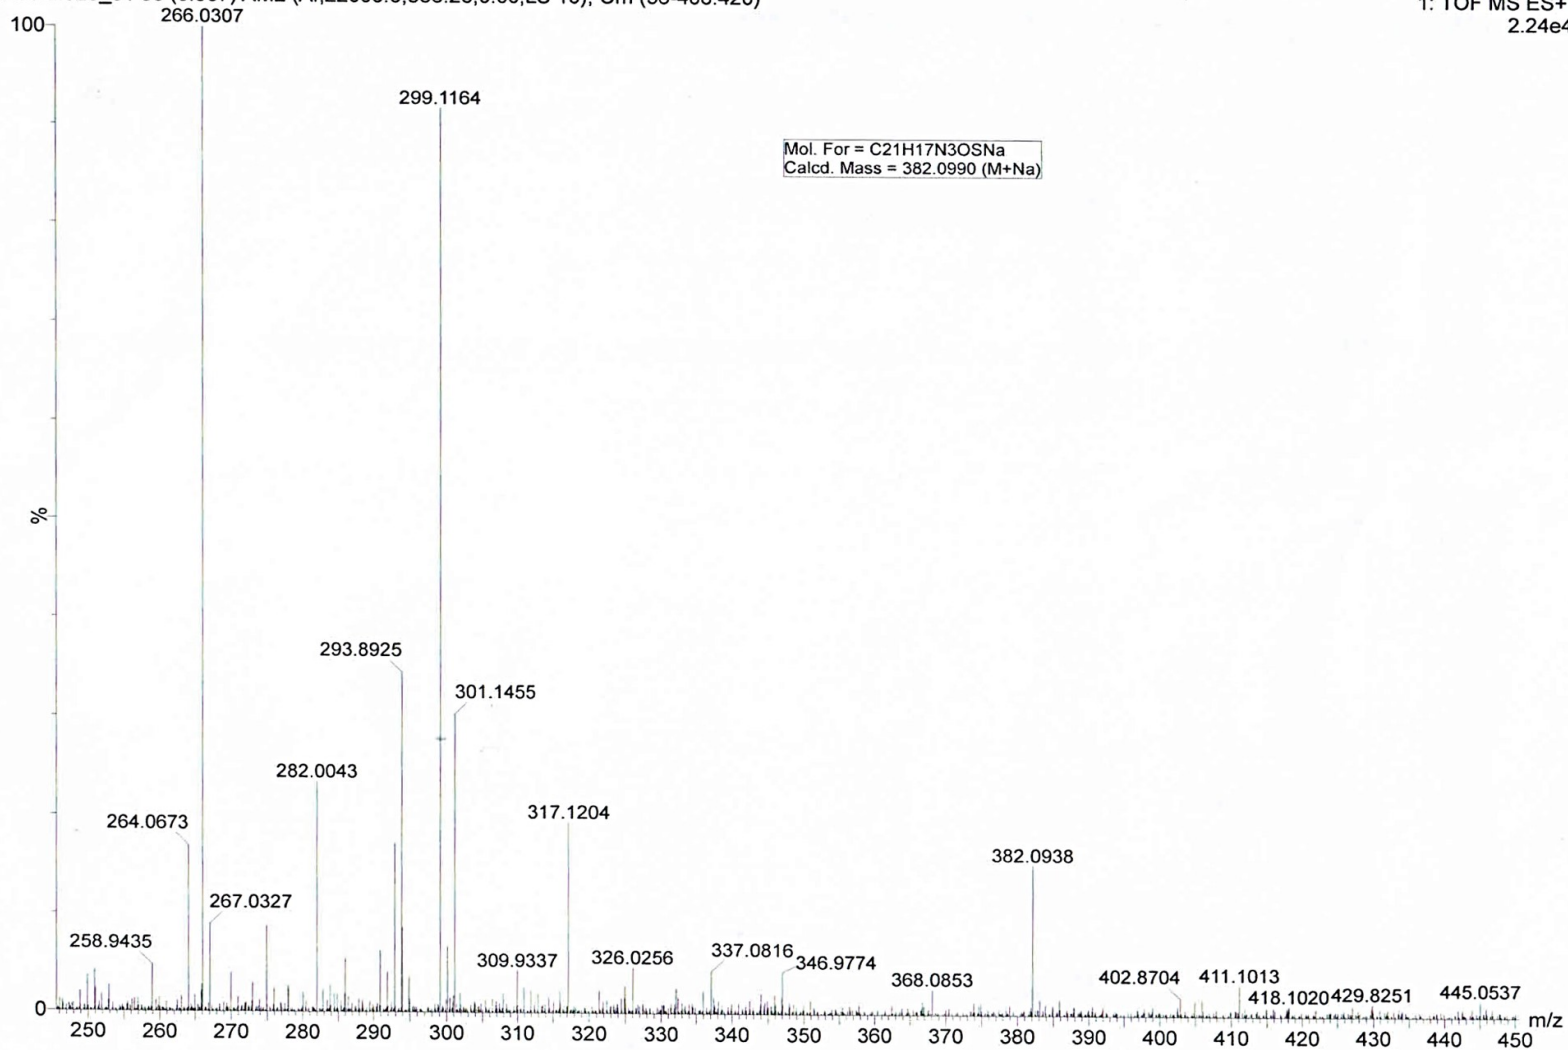

Figure S.12: HRMS-Spectrum of 4b

TB

IISER BERHAMPUR  
CAIF HRMS FACILITY  
XEVO-G2XSQTOF#YFA1829

23-Aug-2024 16:09:37

TB-SM-GP-01 New 24 (0.457) AM2 (Ar,22000.0,556.28,0.00,LS 10)

1: TOF MS ES+  
3.00e6

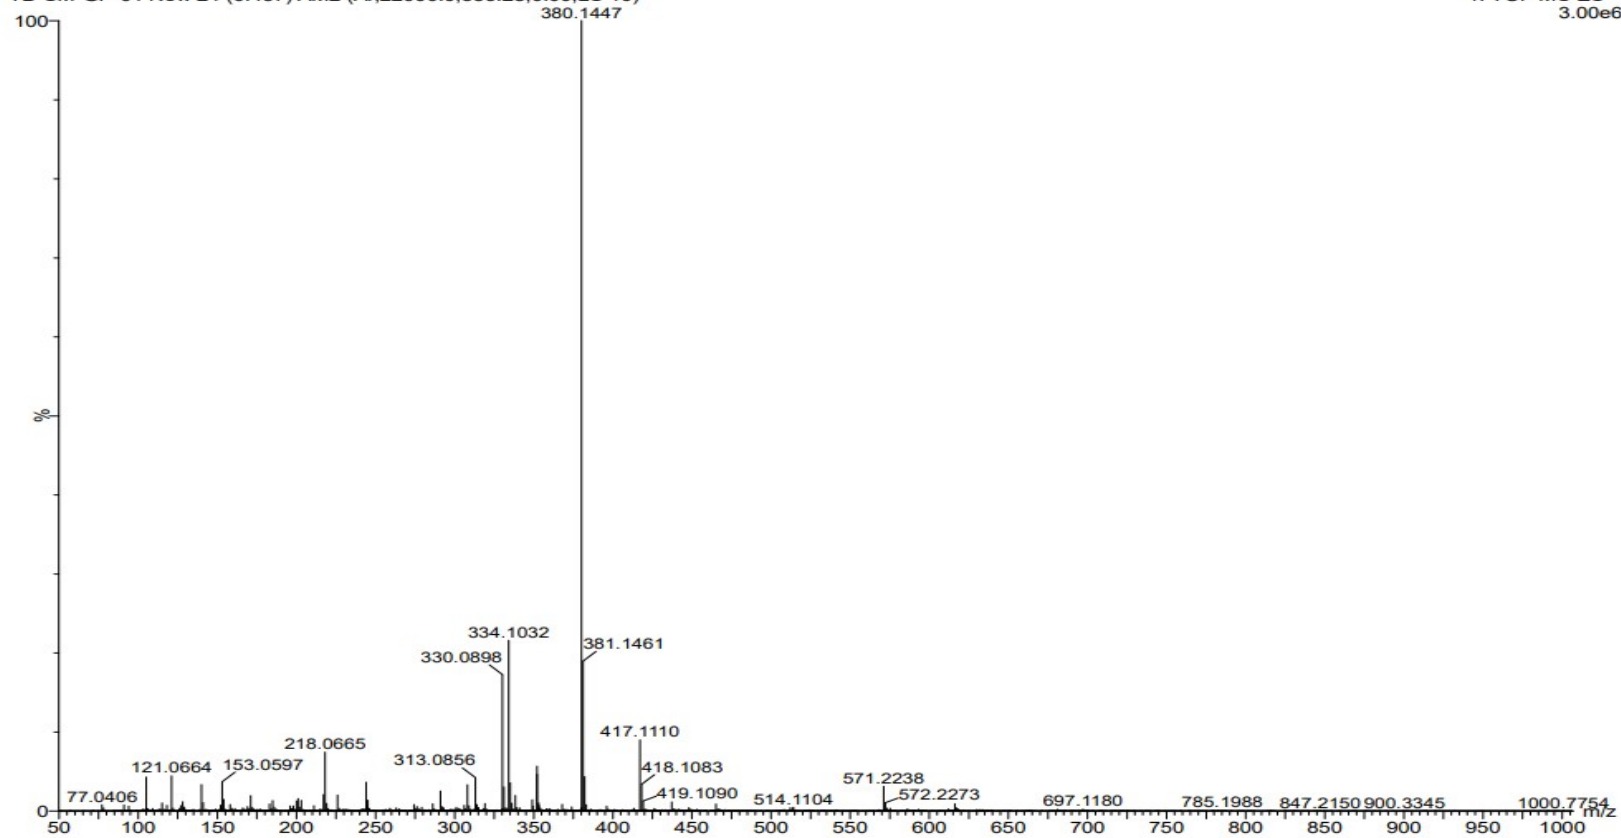

Figure S.13: HRMS-Spectrum of 4c

TB

IISER BERHAMPUR  
CAIF HRMS FACILITY  
XEVO-G2XSQTOF#YFA1829

23-Aug-2024 15:22:19

TB-SM-GP-05 73 (0.700) AM2 (Ar,22000.0,556.28,0.00,LS 10); Cm (37:80)

1: TOF MS ES+  
8.61e7

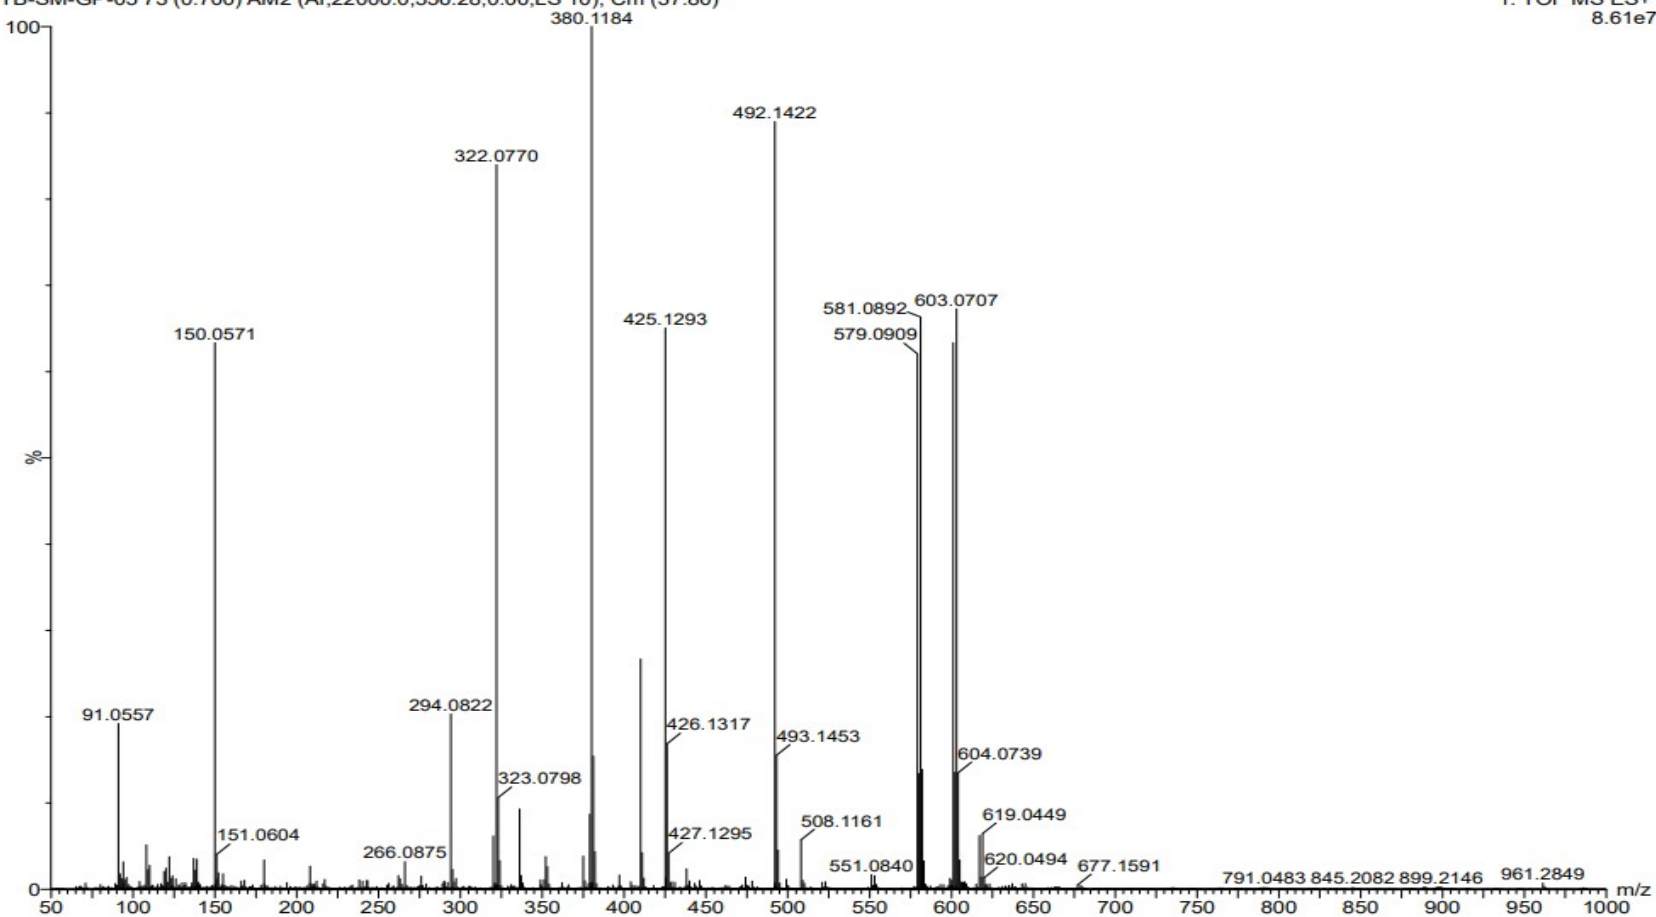

Figure S.14: HRMS-Spectrum of 4d

TB

23-Aug-2024 16:17:09

IISER BERHAMPUR  
CAIF HRMS FACILITY  
XEVO-G2XSQTOF#YFA1829

TB-SM-GP-02 New 27 (0.519) AM2 (Ar,22000.0,556.28,0.00,LS 10)

1: TOF MS ES+  
6.75e6

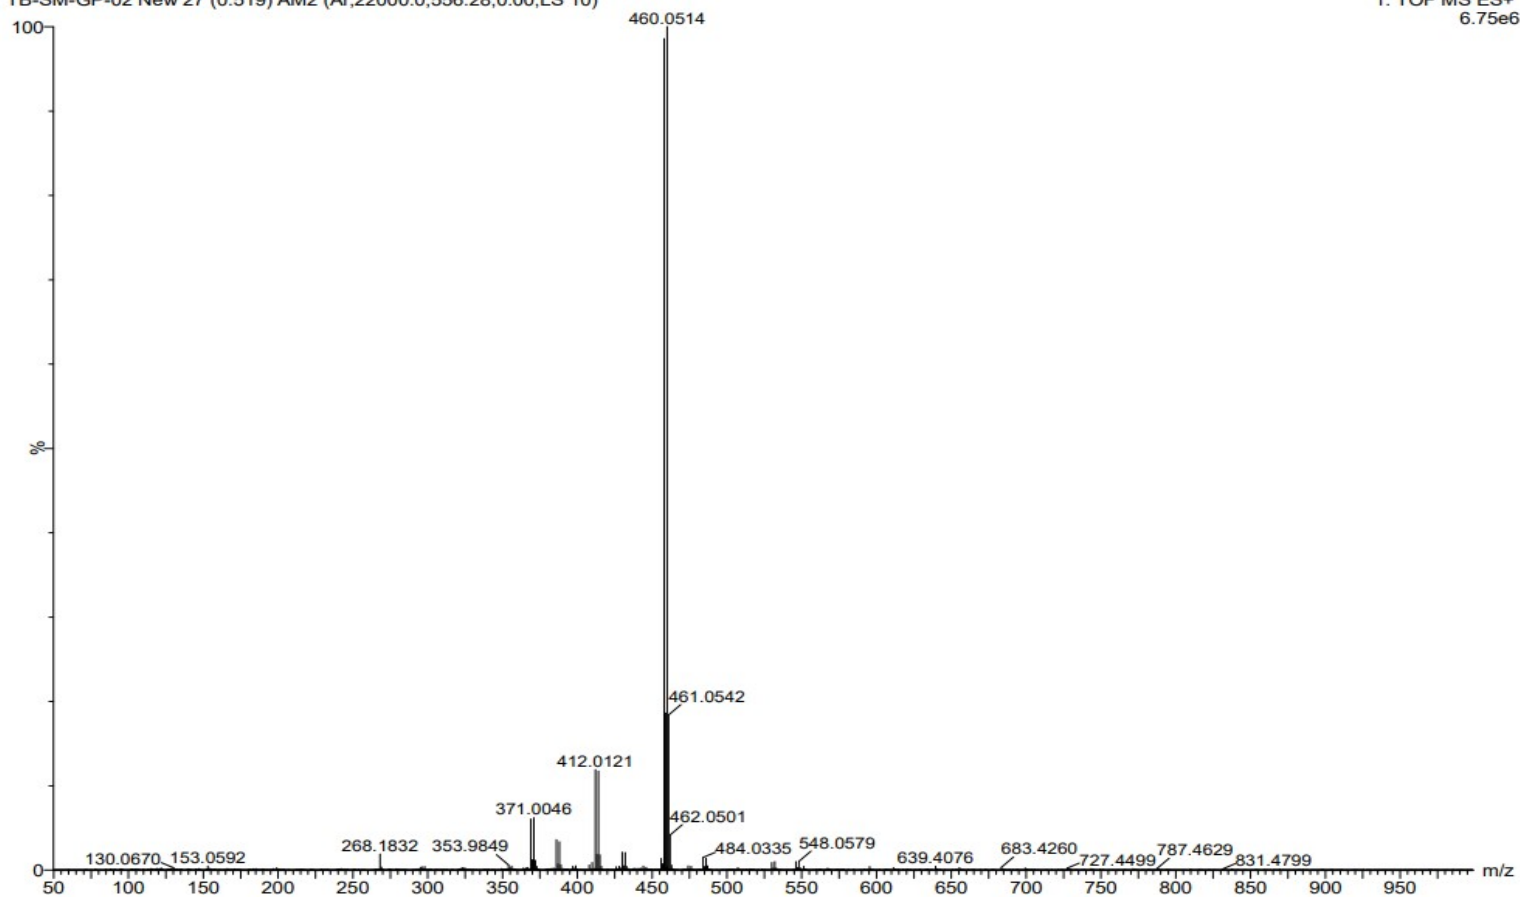

Figure S.15: HRMS-Spectrum of **4e**

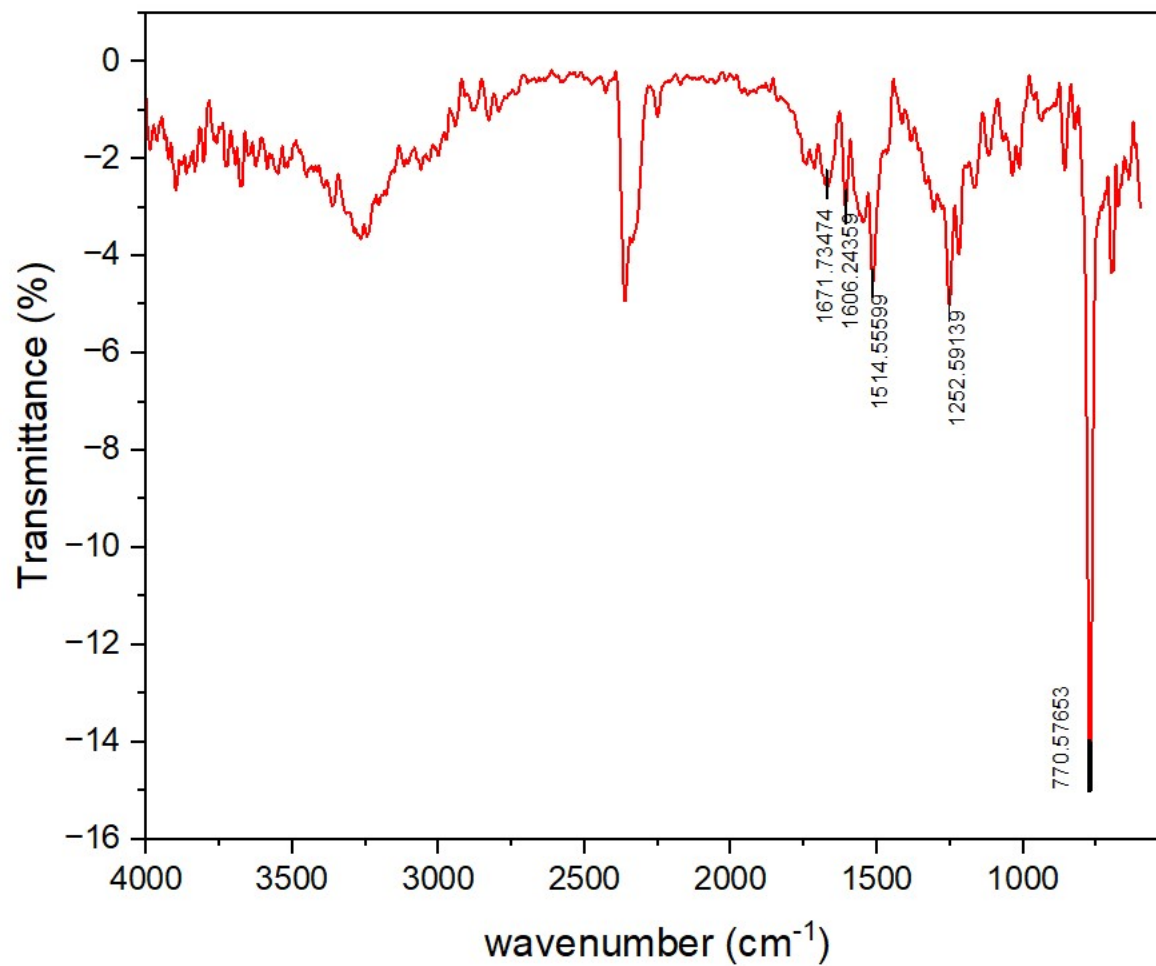

**Figure S.16: FTIR-Spectrum of 4a**



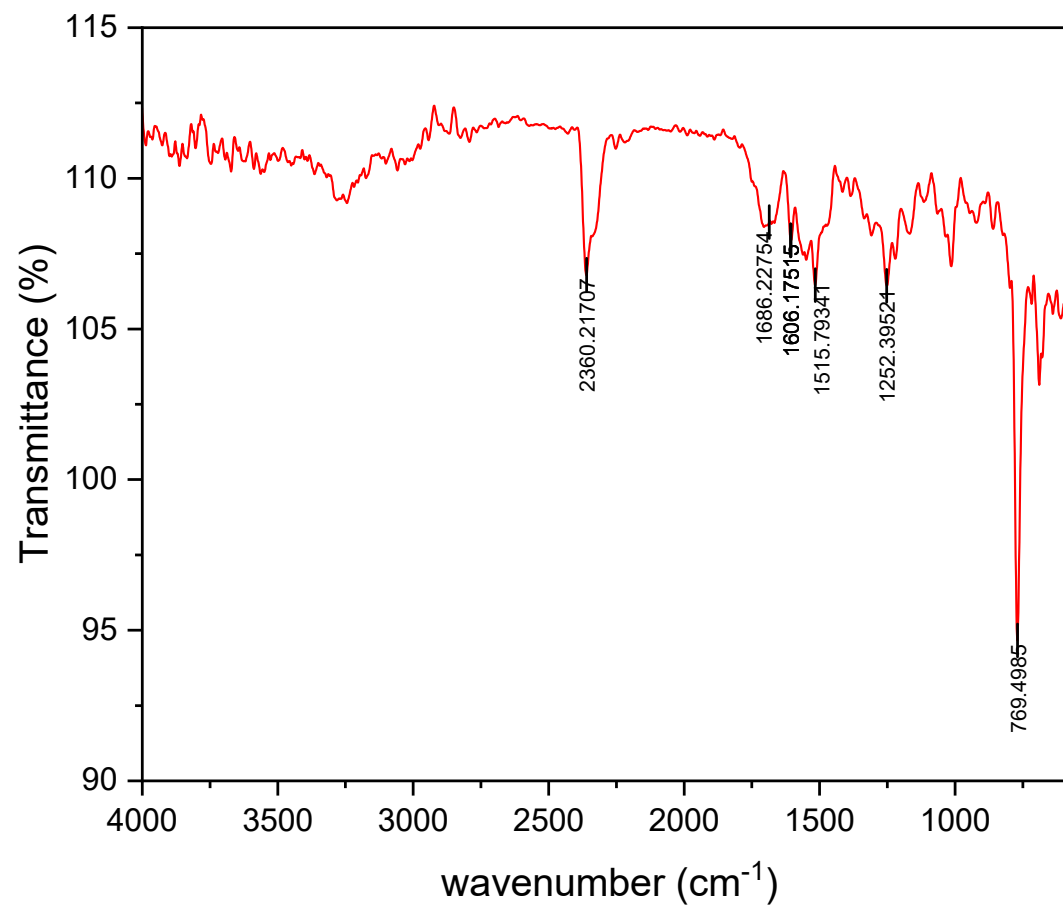

**Figure S.17: FTIR-Spectrum of 4b**

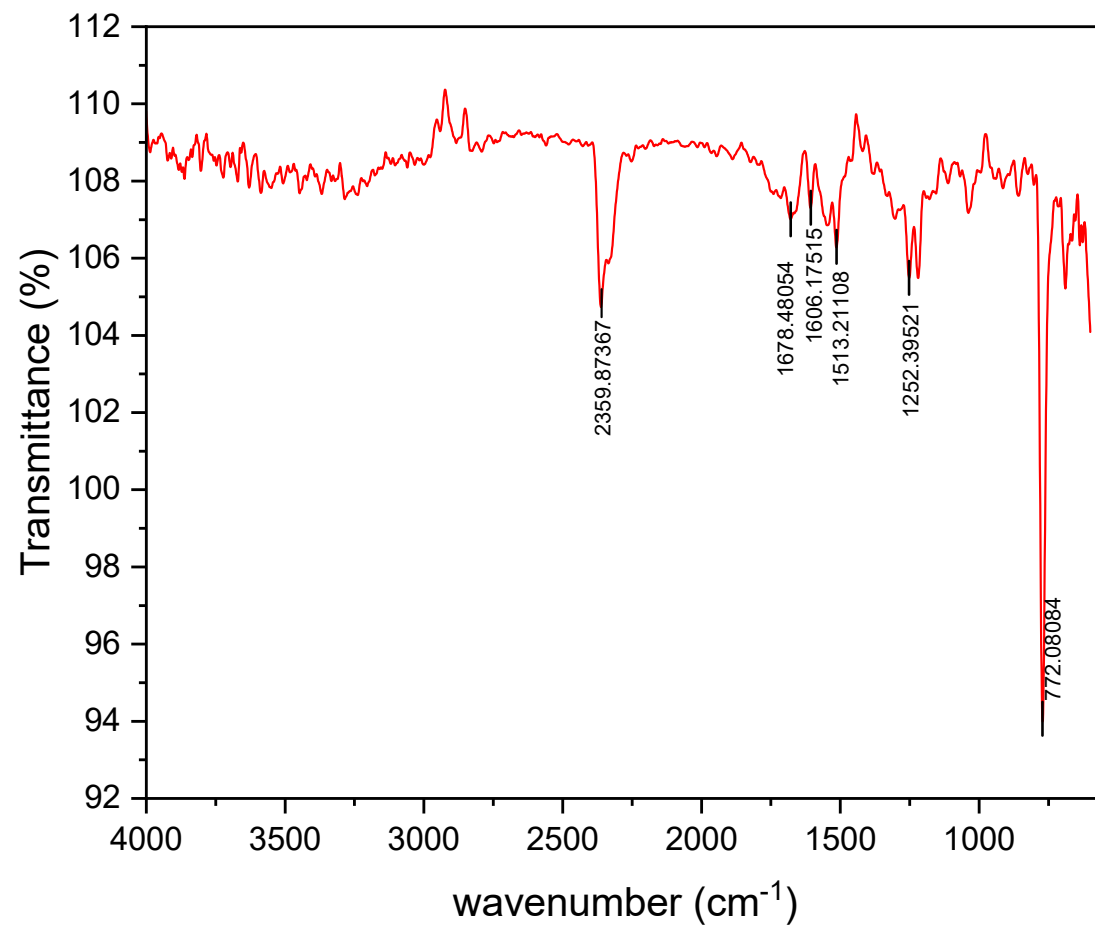

**Figure S.18: FTIR-Spectrum of 4c**

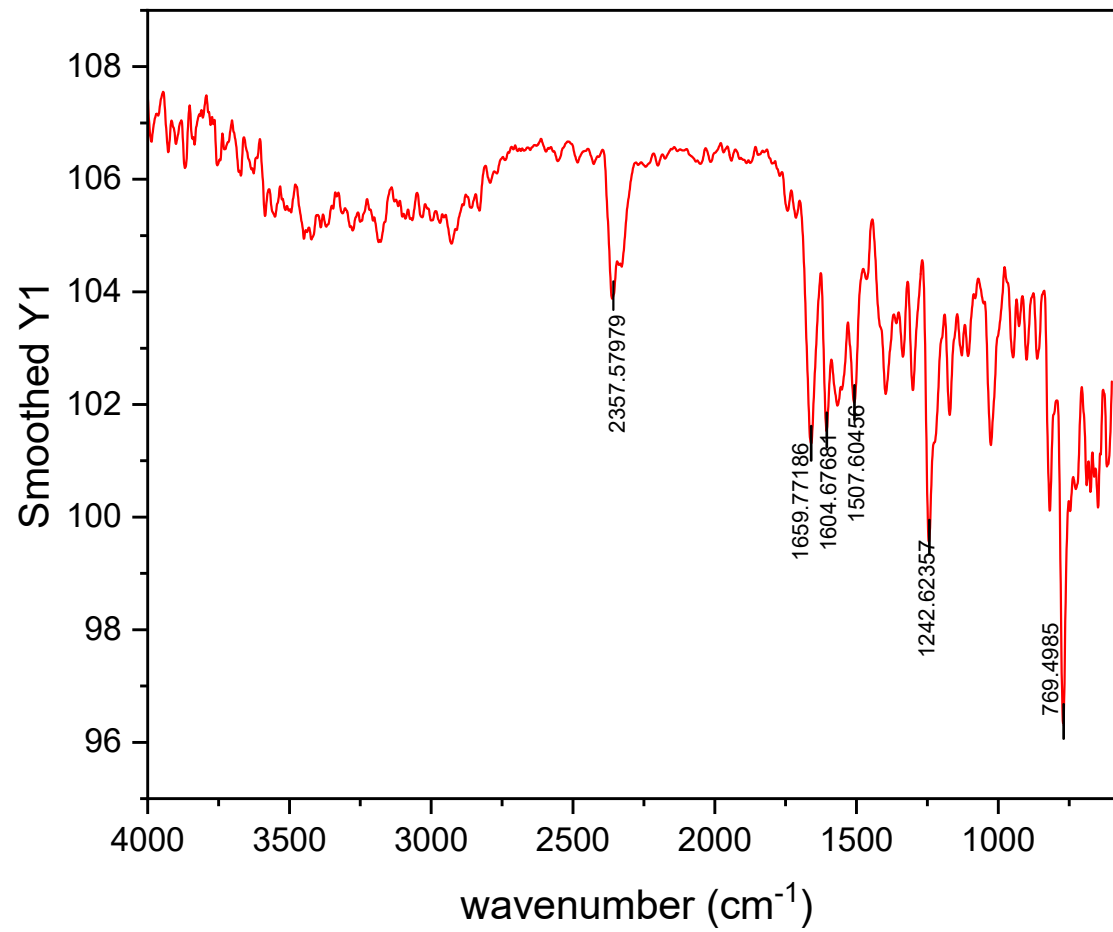

**Figure S.19: FTIR-Spectrum of 4d**

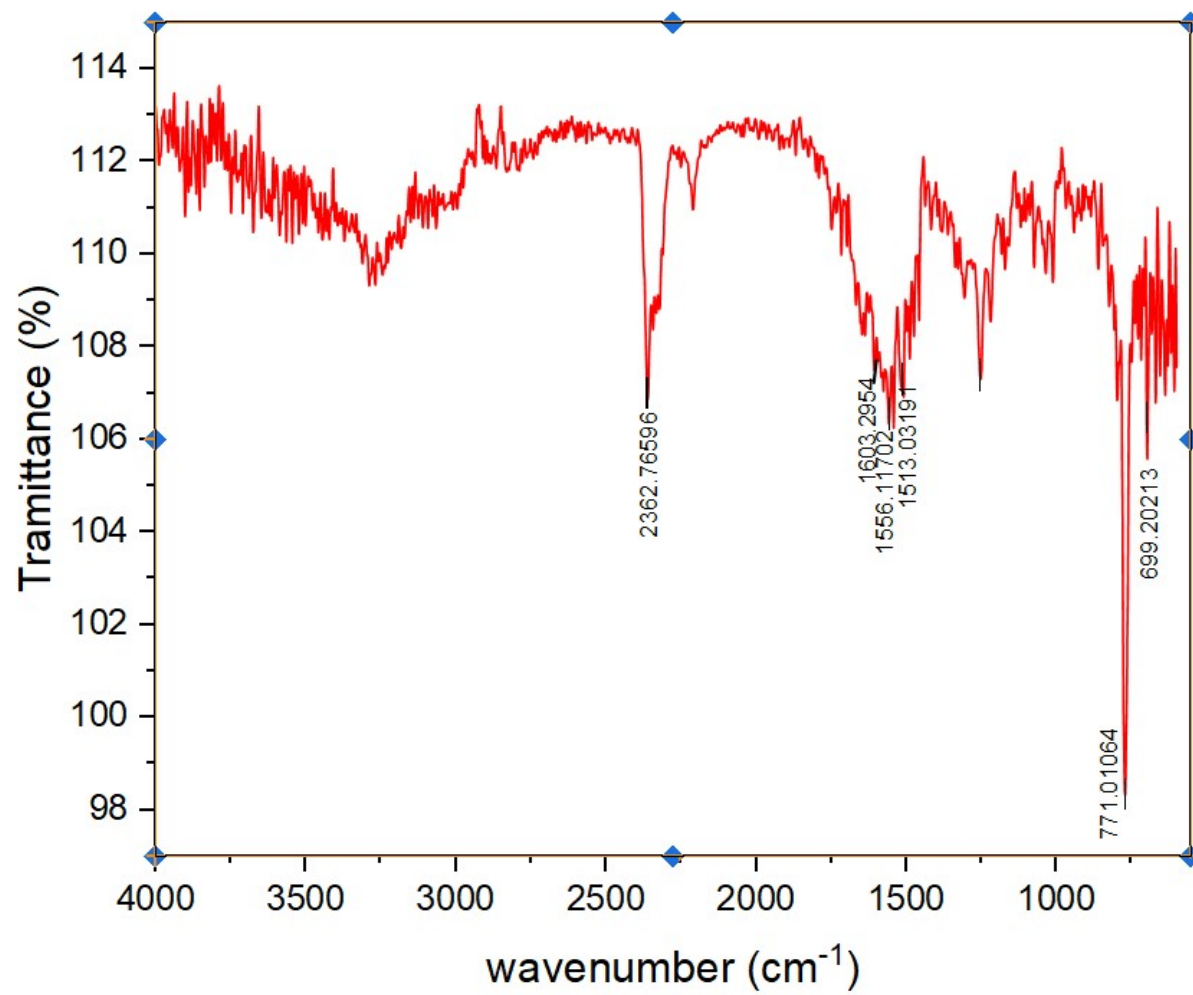

Figure S.20: FTIR-Spectrum of 4e

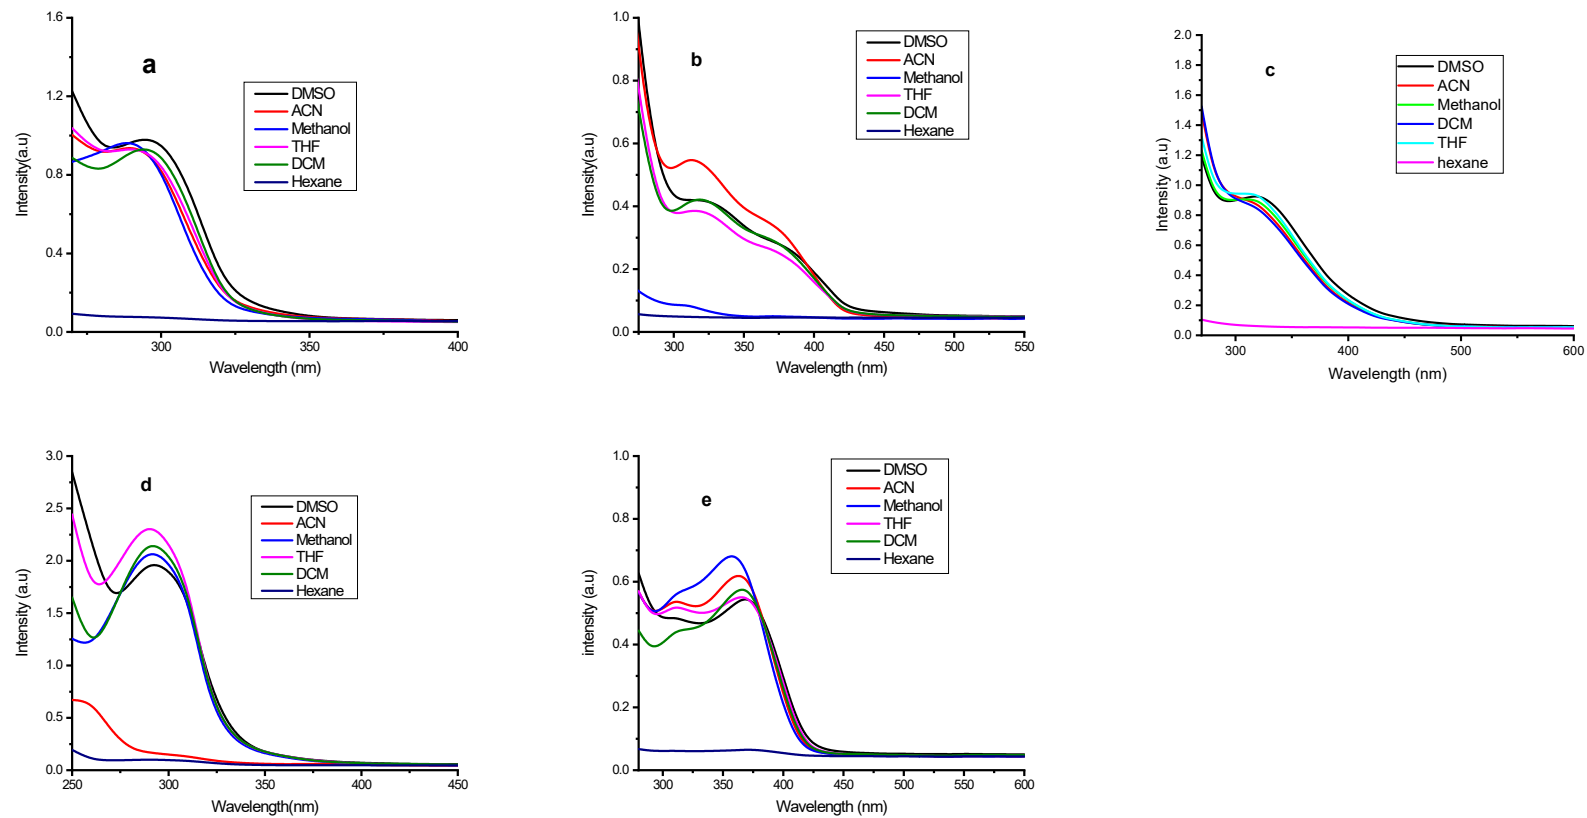

**Figure S.21.** Uv-Vis spectra of 4e ( $5 \times 10^{-5}$  M) in Various solvents

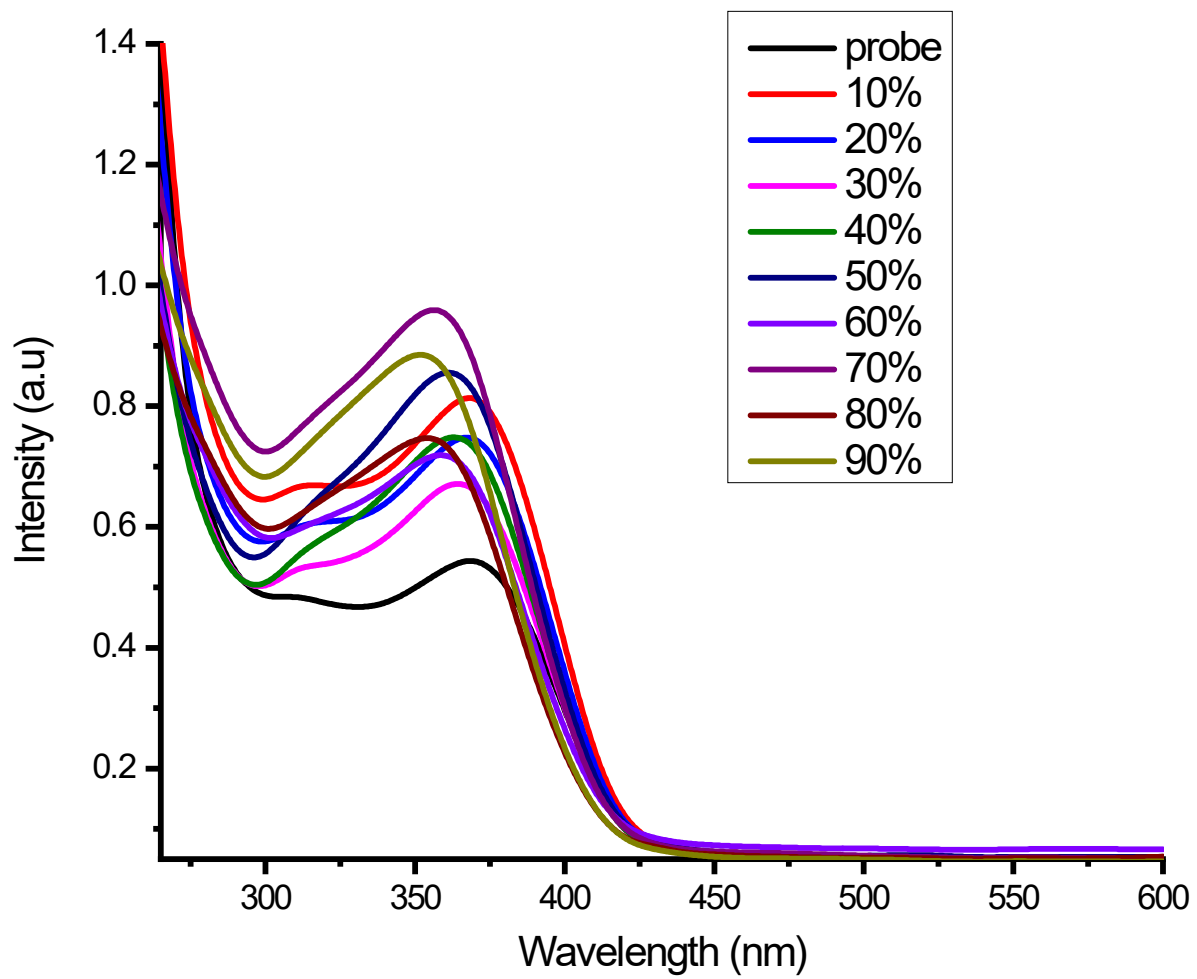

**Figure S.22.** UV- Vis spectra of 4e ( $5 \times 10^{-5}$  M) in DMSO: water solvent mixtures

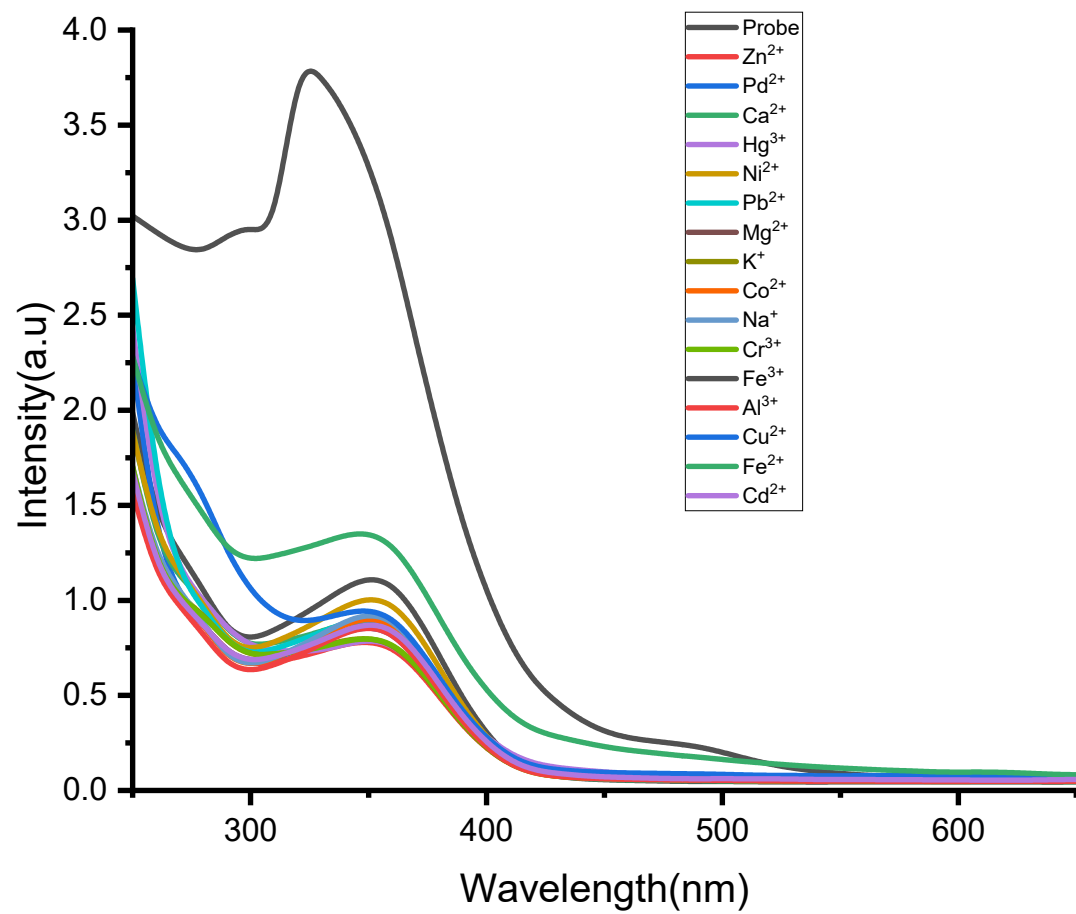

**Figure S.23.** UV- Vis spectra of 4e ( $5 \times 10^{-5}$  M) in different metal cations (300 $\mu$ l)

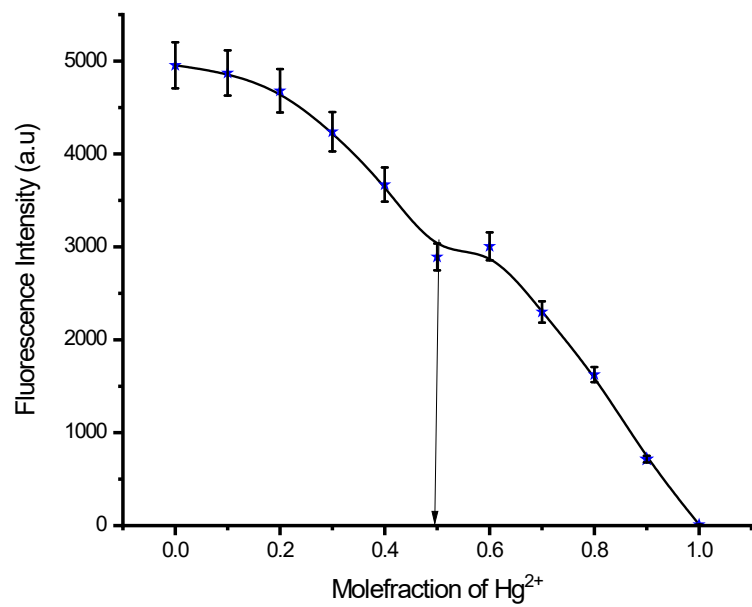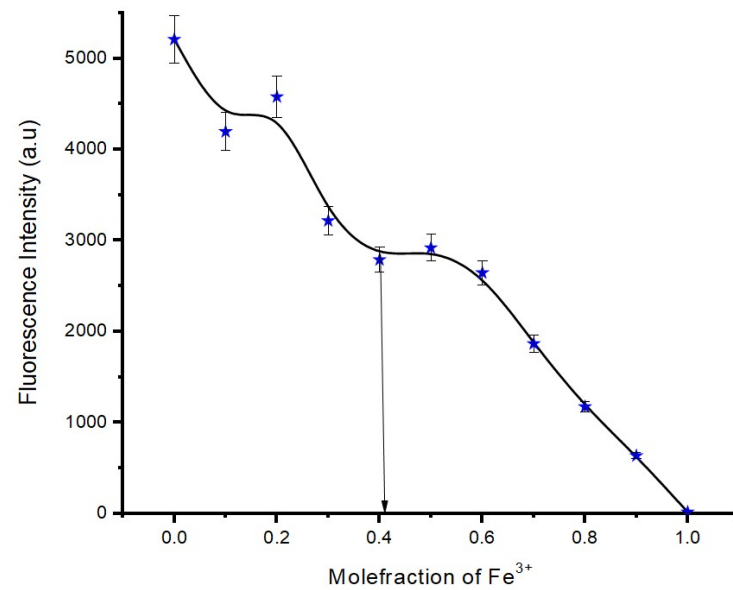

**Figure S.24:** Job's plot between the Fluorescence intensity of 4e and the mole fraction of Fe<sup>3+</sup> and Hg<sup>2+</sup>



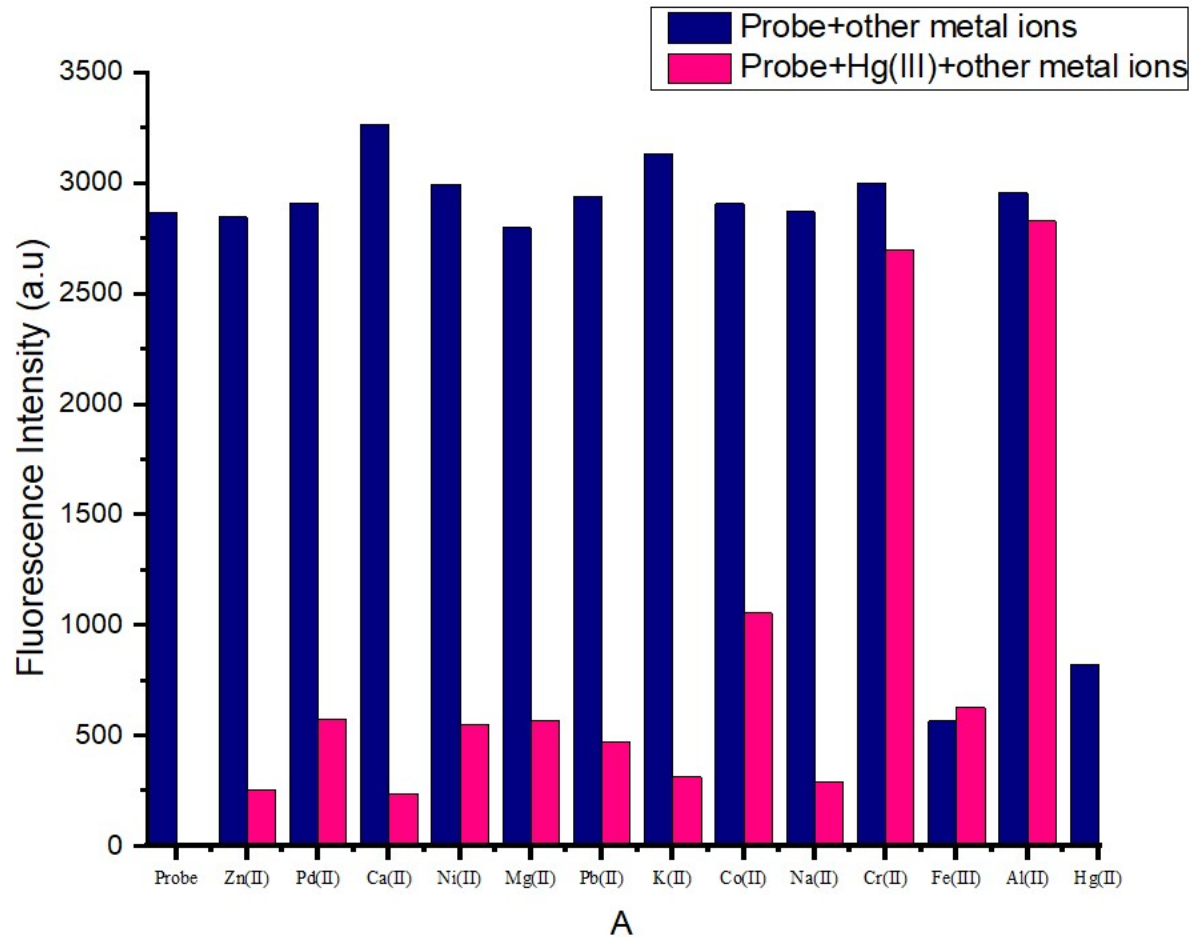

**Figures S.25.** Interference study of A-4e ( $5 \times 10^{-5}$  M) in DMSO solvent presence of various metal ions. Blue bars represent the Fluorescence intensity of A-4e + metal cation systems; Pink bars represent the Fluorescence intensity of Hg<sup>2+</sup> + metal cation systems.

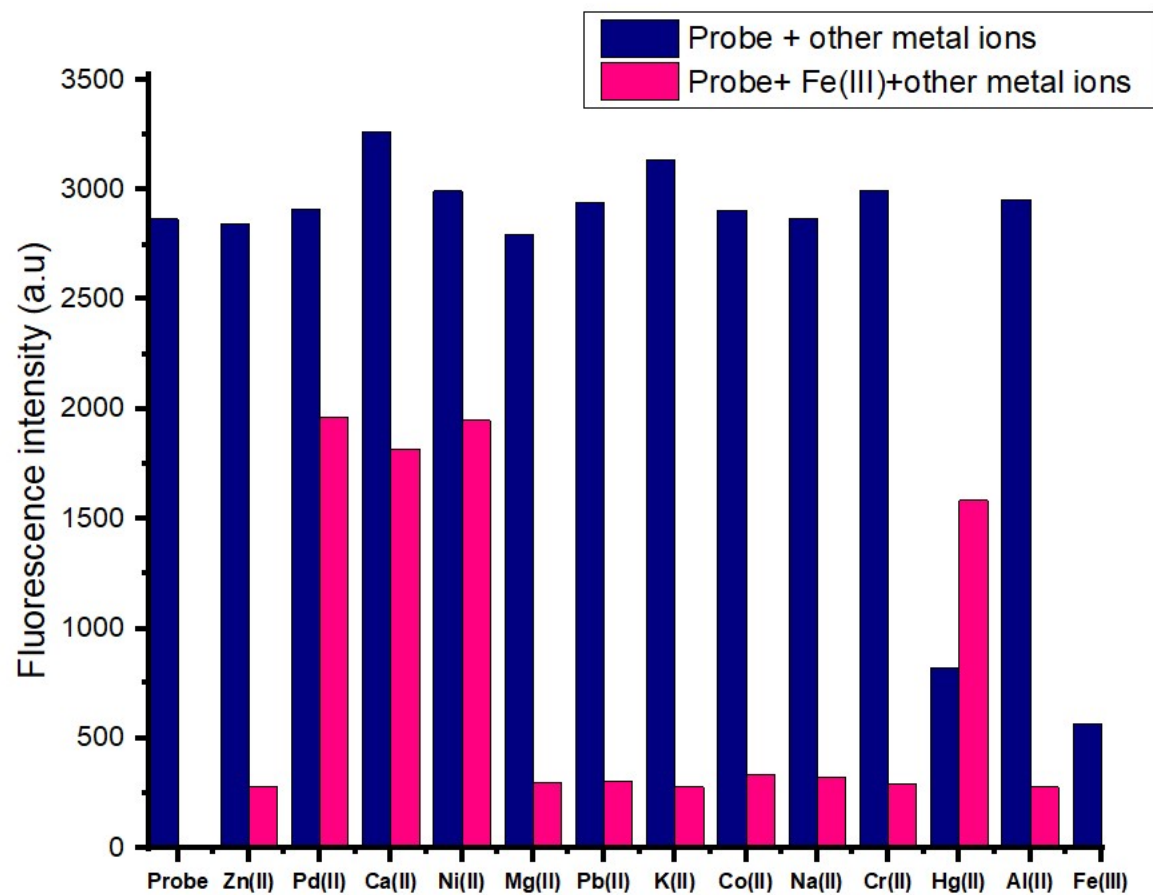

**Figures S.26.** Interference study of A-4e ( $5 \times 10^{-5}$  M) in DMSO solvent presence of various metal ions. Blue bars represent the Fluorescence intensity of A-4e + metal cation systems; Pink bars represent the Fluorescence intensity of  $\text{Fe}^{3+}$  + metal cation systems.

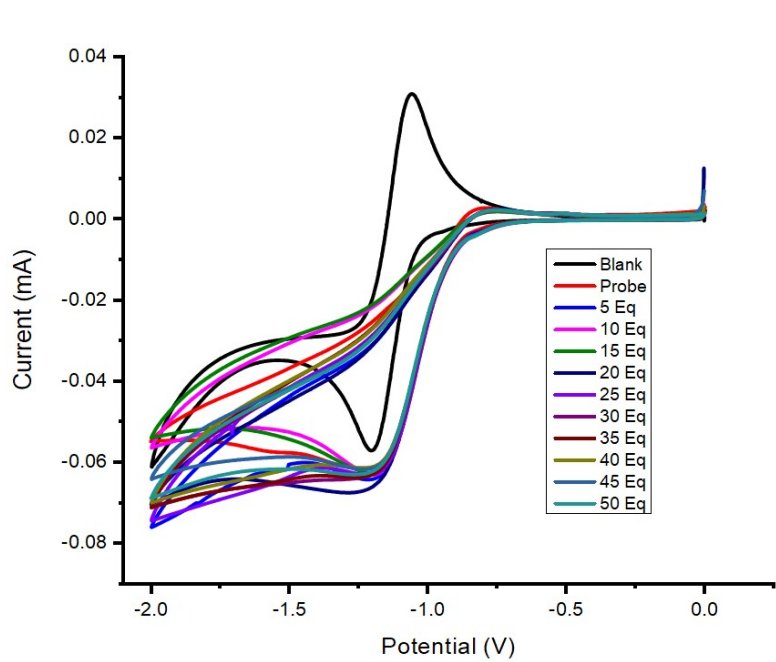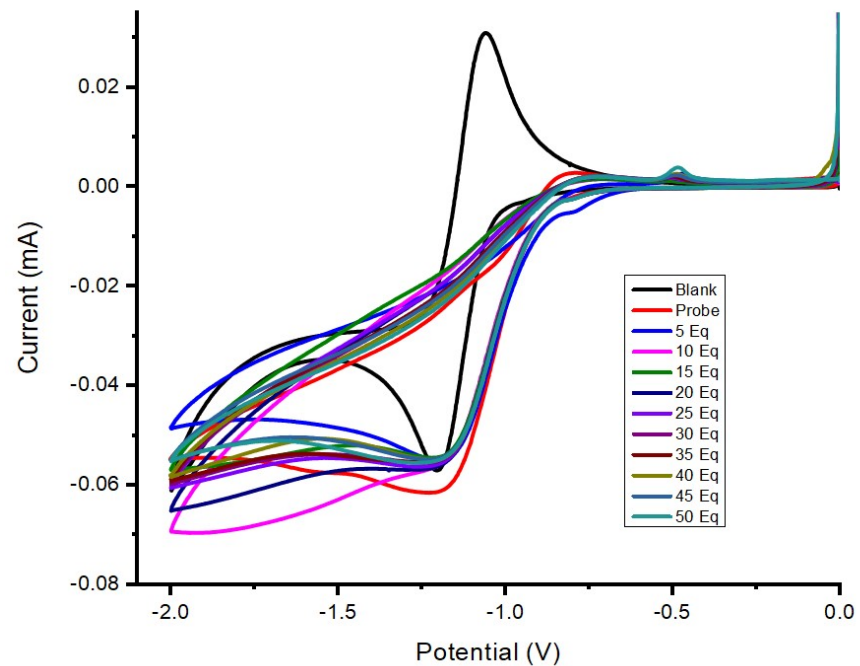

**Figures S.27:** (a) Cyclic voltammetry titration of A-4e with  $\text{Fe}^{3+}$  ions (0-50  $\mu\text{l}$ ) (b) Cyclic voltammetry titration of A-4e with  $\text{Hg}^{2+}$  ions (0-50  $\mu\text{l}$ ).

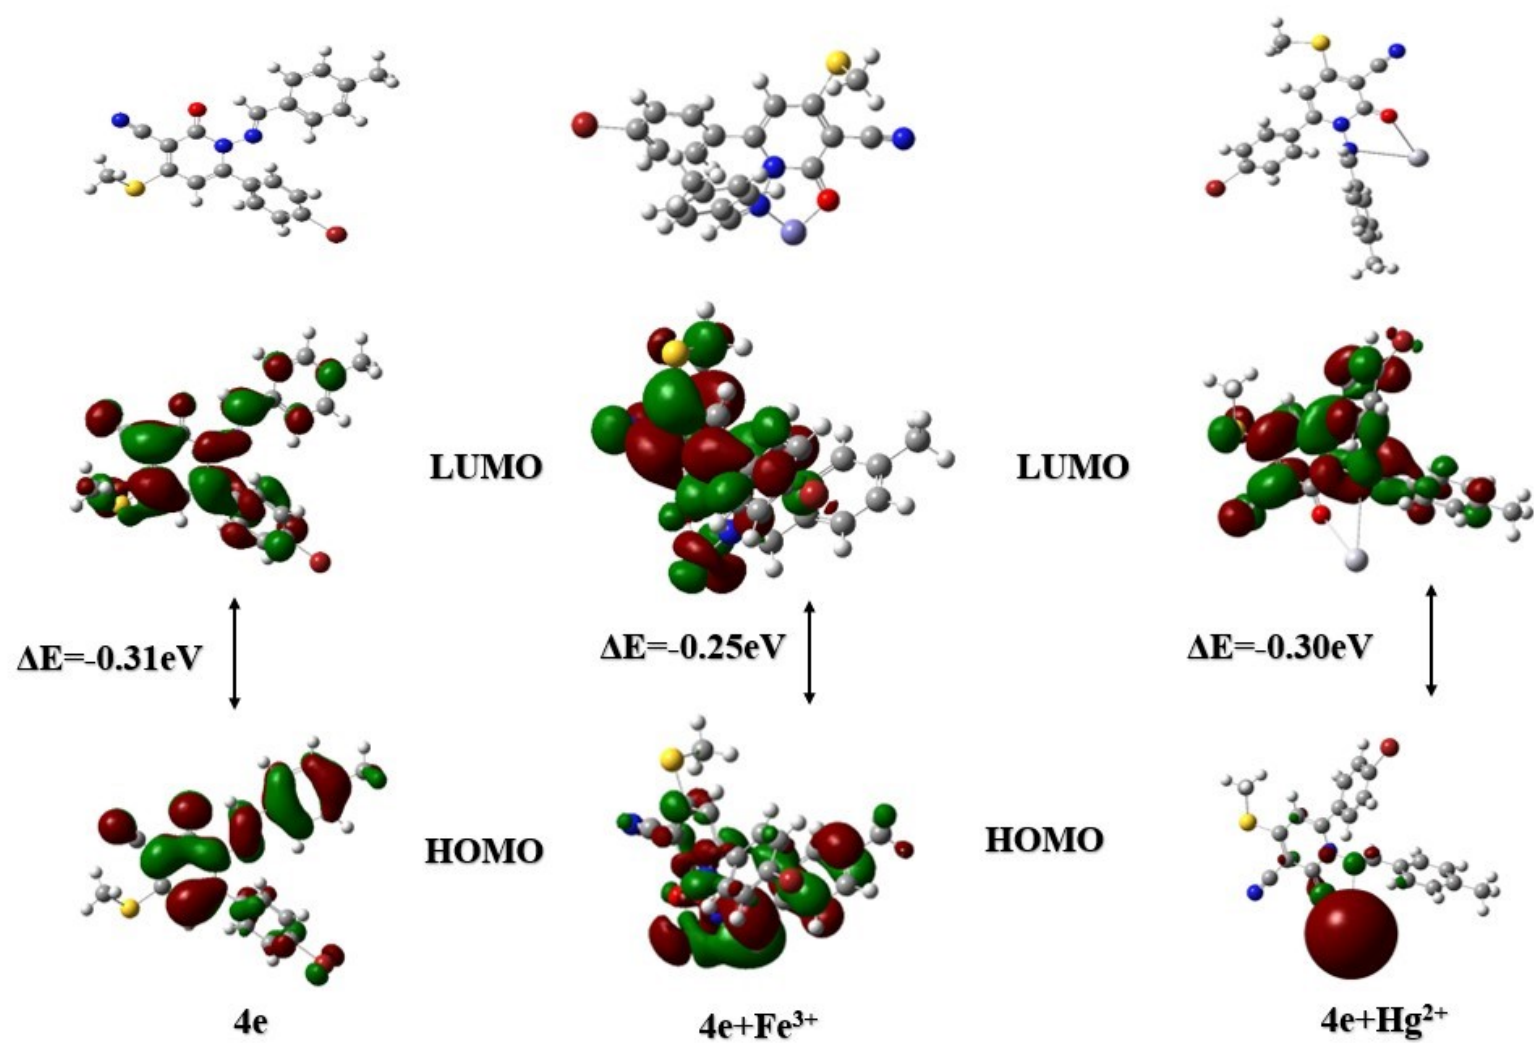

**Figure S.28:** Calculated HOMOs and LUMOs of 4e and 4e+Fe<sup>3+</sup> and 4e+Hg<sup>2+</sup>

|                       | $\lambda_{\text{ex}}$ | $\lambda_{\text{em}}$ | $\tau_1$ (rel%) | $\tau_2$ (rel%) | $\tau_3$ (rel%) | $T_{\text{average(ns)}}$ | $\chi^2$ |
|-----------------------|-----------------------|-----------------------|-----------------|-----------------|-----------------|--------------------------|----------|
| 4e (Probe)            | 350nm                 | 450nm                 | 0.255636        | 4.77261         | -               | 0.96                     | 1.357502 |
| A-4e                  | 350nm                 | 470nm                 | 0.304501        | 1.68946         | -               | 1.54                     | 1.009198 |
| A-4e+Fe <sup>3+</sup> | 350nm                 | 470nm                 | 0.21956         | 1.63526         | -               | 1.47                     | 1.044633 |
| A-4e+Hg <sup>2+</sup> | 350nm                 | 470nm                 | 0.215328        | 1.01693         | 4.76184         | 0.89                     | 1.137985 |

**TCSPC – (Time correlated single photon counting) spectrometer for probe**

4e, A-4e, A-4e+Fe<sup>3+</sup> and A-4e+Hg<sup>2+</sup>

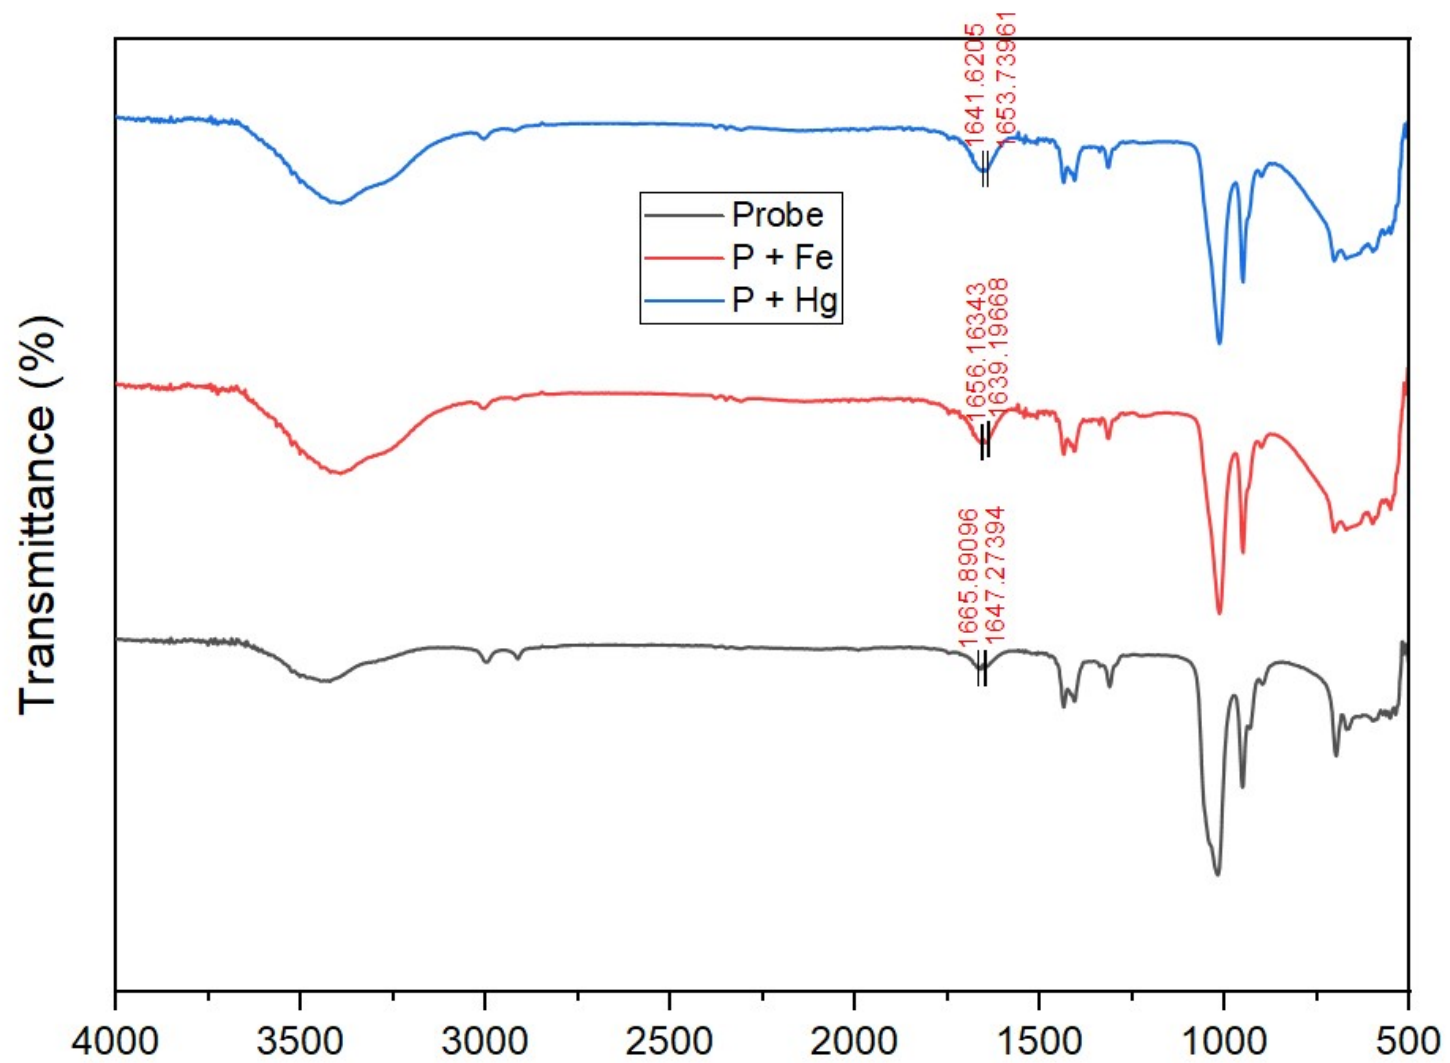

**Figure S.29:** FTIR spectra of 4e in the presence of  $\text{Fe}^{3+}$  and  $\text{Hg}^{2+}$
